# Supplementary material
Source: PubMed Central journal article supplement (PMC7733807)
Supplement: pnas.2020124117.sapp.pdf [file pnas.2020124117.sapp.pdf]

PNAS, Research Article

Section: *Biochemistry*

October 8, 2020

**Supporting Information (SI):**  
**The Arg/N-degron pathway targets transcription factors**  
**and regulates specific genes**

Tri T. M. Vu<sup>a</sup>, Dylan C. Mitchell<sup>b</sup>, Steven P. Gygi<sup>b</sup> and Alexander Varshavsky<sup>a,1</sup>

<sup>a</sup>Division of Biology and Biological Engineering,  
California Institute of Technology, Pasadena, CA 91125, USA

<sup>b</sup>Department of Cell Biology, Harvard Medical School, Boston, MA 02115

<sup>1</sup>Track-III paper, contributed by Alexander Varshavsky.

Email: avarsh@caltech.edu. Telephone: 818-606-1908.

*Running title:* Regulation by the Arg/N-degron pathway

*Keywords:* transcription, degradation, UBR1, GR, PREP1.

**This PDF contains:**

Figures S1-S13 and their legends.

Materials and Methods.

Tables S1 and S2.

References for SI.

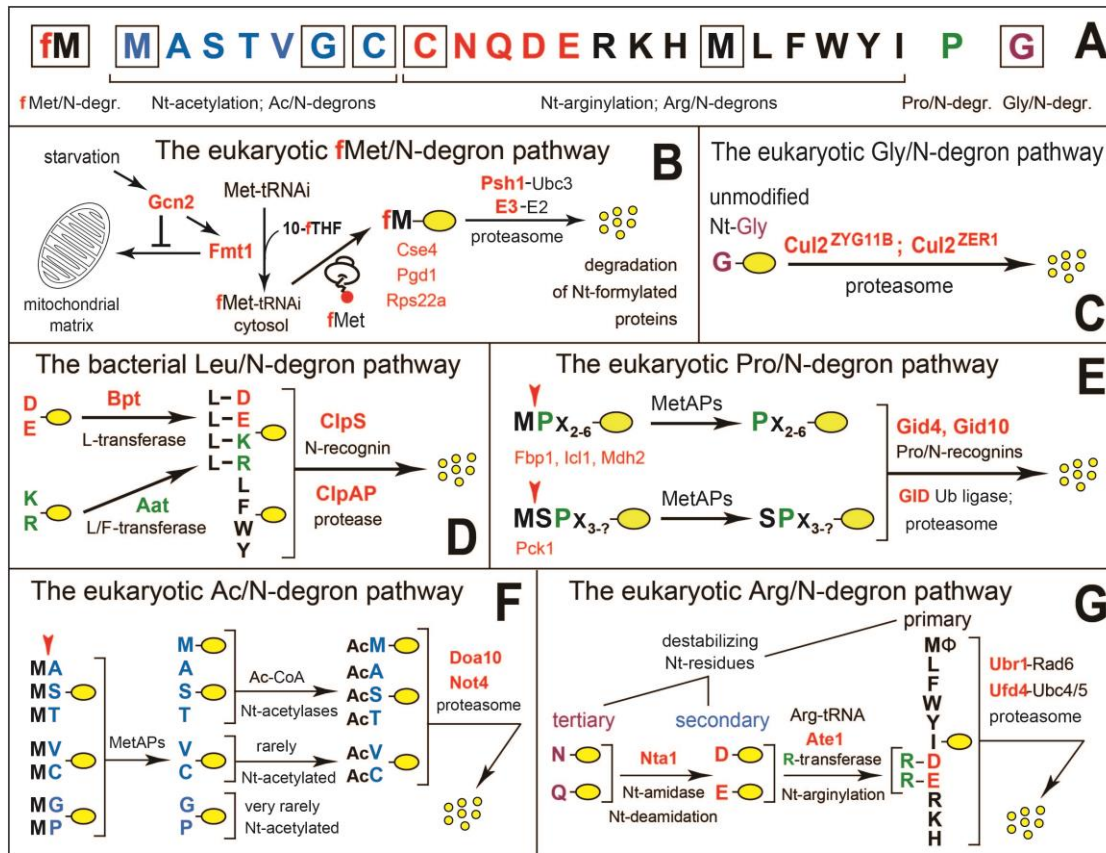

**Fig. S1.** N-degron pathways. N-terminal (Nt) residues are indicated by single-letter abbreviations. A yellow oval denotes the rest of a protein substrate. (A) Twenty amino acids of the genetic code are arranged to delineate Nt-residues of N-degrons. Amino acids that are cited more than once are marked by square frames. Nt-Met is cited thrice, since it can be recognized by the Ac/N-degron pathway, as Nt-acetylated Ac-Met, by the Arg/N-degron pathway, as unacetylated Nt-Met, and by the fMet/N-degron pathway, as Nt-formylated fMet. Nt-Cys is cited twice, since it can be recognized by the Ac/N-degron pathway, as Nt-acetylated Cys, and by the Arg/N-degron pathway, as Nt-arginylatable Nt-Cys sulfinic acid or Nt-Cys-sulfonate, formed in multicellular eukaryotes but apparently not in unstressed *S. cerevisiae*. Nt-Gly is cited twice, since it can be recognized by the Gly/N-degron pathway, as unmodified Mt-Gly, and by the Ac/N-degron pathway, as (rarely) Nt-acetylated Gly. (B) The eukaryotic (*Saccharomyces cerevisiae*) fMet/N-degron pathway. 10-fTHF, 10-formyltetrahydrofolate. (C) The eukaryotic (mammalian) Gly/N-degron pathway. (D) The bacterial (*Vibrio vulnificus*) Leu/N-degron pathway. (E) The eukaryotic (*S. cerevisiae*) Pro/N-degron pathway. (F) The eukaryotic (*S. cerevisiae*) Ac/N-degron pathway. (G) The eukaryotic (*S. cerevisiae*) Arg/N-degron pathway. See the main text (Introduction) for references and other details.

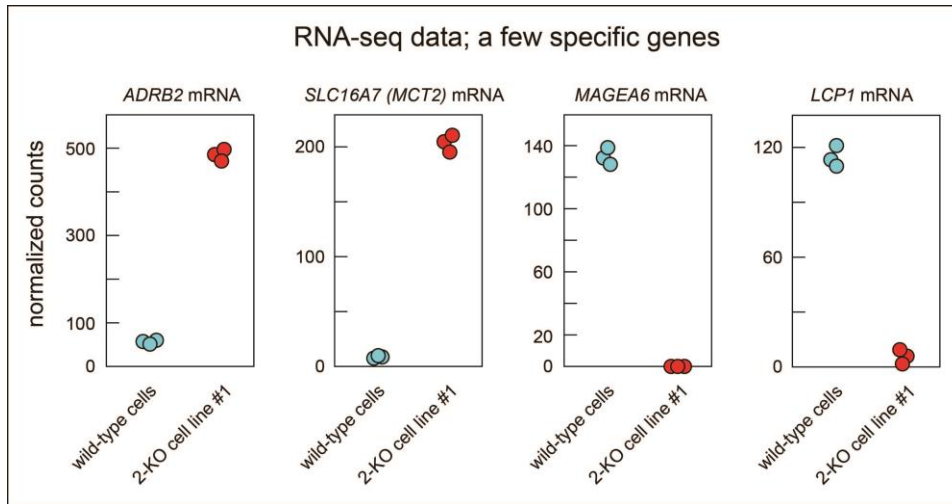

**Fig. S2.** Relative levels of *hsADRB2*, *hsSLC16A7* (*hsMCT2*), *hsMAGEA6*, and *hsLCP1* human mRNAs in 2-KO [*hsUBR1*<sup>-/-</sup> *hsUBR2*<sup>-/-</sup>] HEK293T cells (2-KO cell line #1) (red circles) and in wild-type cells (blue circles), as measured by genome-wide RNA-seq, with three parallel and independent measurements, as indicated. See also the main text, Fig. 2D, and *SI Appendix*, Figs. S4 and S5A.

## Examples of RT-qPCR measurements

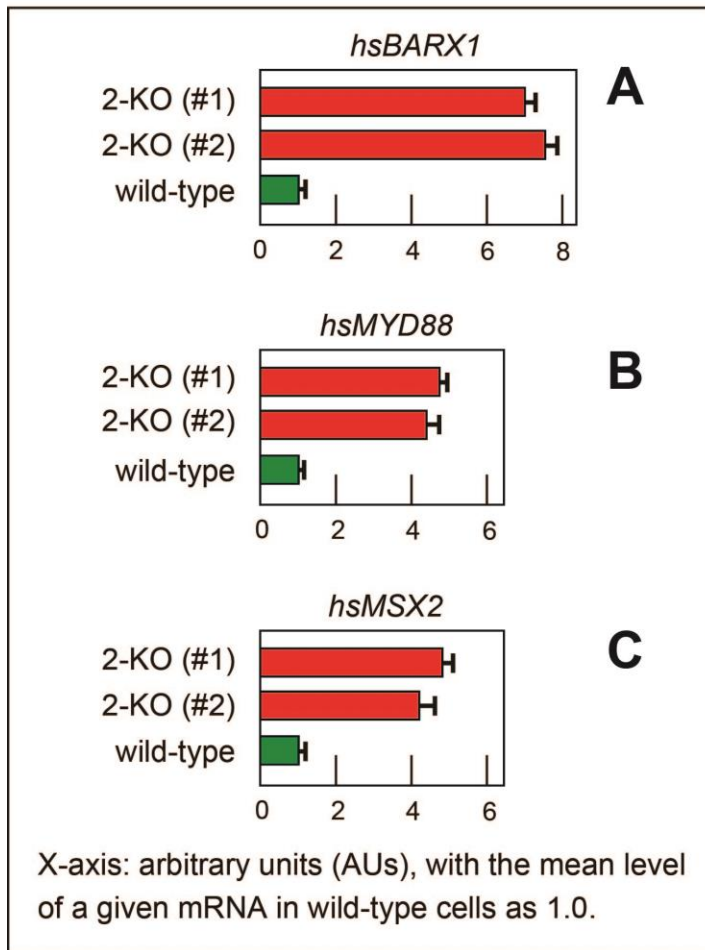

**Fig. S3.** Relative levels of specific human mRNAs (*hsBARX1*, *hsMYD88*, *hsMSX2*) in 2-KO [*hsUBR1*<sup>-/-</sup> *hsUBR2*<sup>-/-</sup>] HEK293T cells (2-KO cell lines #1 and #2) vs. wild-type HEK293T cells, as measured by RT-qPCR. See also the main text, *SI Appendix*, Fig. S4, and Materials and Methods.

mRNAs **upregulated** by 2-fold or more in [*UBR1*<sup>-/-</sup>*UBR2*<sup>-/-</sup>] HEK293T cells

| Gene                | Fold-change, in 2-KO cells | Protein; functions                                            |
|---------------------|----------------------------|---------------------------------------------------------------|
| <i>SLC16A7</i>      | 22.0-fold; 34.8-fold       | <i>MCT2</i> ; monocarboxylate (incl. lactate) transporter     |
| <i>ADRB2</i>        | 5.9; <b>17.0</b>           | $\beta$ -adrenergic receptor-2, recognizing catecholamines    |
| <i>LGALS3BP</i>     | 6.2; 5.0                   | cell adhesion, antiviral activity                             |
| <i>PWWP3B</i>       | 5.6                        | unknown functions                                             |
| <i>ARMCX2</i>       | 5.2                        | a putative mitochondrial protein                              |
| <i>BARX1</i>        | 4.9; 7.3                   | <b>TF; muscle, stomach, teeth, craniofacial development</b>   |
| <i>RASL10B</i>      | 3.3                        | a RAS-like protein; likely regulator of blood pressure        |
| <i>NAP1L3</i>       | 3.2                        | nucleosome assembly protein-1-like 3                          |
| <i>CLU</i>          | 3.1                        | a Ub-binding chaperone                                        |
| <i>MYD88</i>        | 3.1; 4.6                   | signaling functions in the immune system                      |
| <i>HCN2</i>         | 2.9                        | gated K/Na-channel-2                                          |
| <i>NPTX1</i>        | 2.8; 2.1                   | neuronal pentraxin-1; functions at excitatory synapses        |
| <i>RUNX3</i>        | 2.7                        | <b>TF; functions in neurogenesis, in T cells</b>              |
| <i>SOGA3</i>        | 2.7                        | unknown functions                                             |
| <i>CELSR3</i>       | 2.6; 1.6                   | cadherin family member-11                                     |
| <i>DTX3</i>         | 2.6                        | <b>E3 Ub ligase; possible regulator of Notch</b>              |
| <i>INA</i>          | 2.6; 3.3                   | class-4 neuronal intermediate filament                        |
| <i>PNMA3</i>        | 2.6                        | paraneoplastic antigen-3                                      |
| <i>ACSS1</i>        | 2.5                        | acetyl-CoA synthetase 2-like, mitochondrial                   |
| <i>GABRB3</i>       | 2.5                        | GABA receptor subunit beta-3                                  |
| <i>DUSP1</i>        | 2.4                        | dual-specificity phosphatase-1                                |
| <i>HEXD</i>         | 2.4                        | hexosaminidase D                                              |
| <i>TRIM25</i>       | 2.4; 4.5                   | <b>E3 ubiquitin/ISG15 ligase</b>                              |
| <i>BASP1</i>        | 2.3                        | neuronal acidic protein, largely unknown functions            |
| <i>INSM1</i>        | 2.3                        | <b>TF; neurogenesis; cell differentiation</b>                 |
| <i>NPTX2</i>        | 2.3                        | neuronal pentraxin-2                                          |
| <i>KCNQ2</i>        | 2.3                        | voltage-gated K-channel, subfamily Q, member 2                |
| <i>FBF1</i>         | 2.2                        | keratin-binding protein regulating cell polarization          |
| <i>GAA</i>          | 2.2; 2.0                   | lysosomal alpha-glucosidase                                   |
| <i>JADE2</i>        | 2.2                        | <b>E3 Ub ligase, ubiquitylates KDM1A histone demethylase</b>  |
| <i>LOC101928358</i> | 2.2                        | uncharacterized protein                                       |
| <i>MBNL3</i>        | 2.2; 3.3                   | regulates alternative splicing of pre-mRNA                    |
| <i>FOXF1</i>        | 2.1                        | <b>TF; transcriptional activator of lung-specific genes</b>   |
| <i>H1-2</i>         | 2.1                        | H1.2 linker histone                                           |
| <i>BAHCC1</i>       | 2.1                        | chromatin-bound protein containing coiled-coil domain         |
| <i>MSX2</i>         | 2.1; 4.5                   | <b>TF; homeodomain; regulates bone development</b>            |
| <i>SCD5</i>         | 2.1                        | stearoyl-CoA-desaturase                                       |
| <i>RNF213</i>       | 2.0                        | <b>E3 Ub ligase regulating angiogenesis</b>                   |
| <i>ARNT2</i>        | 2.0                        | <b>TF; postnatal brain growth; visual and renal functions</b> |

**Fig. S4.** Human mRNAs that were upregulated by 2-fold or more (from 22-fold to 2-fold) in 2-KO [*hsUBR1*<sup>-/-</sup> *hsUBR2*<sup>-/-</sup>] HEK293T cells (2-KO cell line #1) vs. wild-type HEK293T cells, as measured by RNA-seq, and also, for indicated mRNAs, by <sup>32</sup>P-Northern hybridization or by RT-qPCR. Values of fold-changes (second column) that were determined by RNA-seq, by <sup>32</sup>P-Northern, and by RT-qPCR are denoted, respectively, in black, red and green. In the third column, transcription factors (TF) and components of the ubiquitin-proteasome system are denoted, respectively, in red and blue. Functions of the cited proteins were compiled using entries in Uniprot (<https://www.uniprot.org/>) and/or GeneCards (<https://www.genecards.org/>). See also Fig. 2, the main text, and *SI Appendix*, Materials and Methods.

**(A)** mRNAs decreased (from <0.01 to 0.38) in [*UBR1*<sup>-/-</sup> *UBR2*<sup>-/-</sup>] cells

| Gene            | Fold-change, in 2-KO cells | Protein; functions                                         |
|-----------------|----------------------------|------------------------------------------------------------|
| <i>MAGEA6</i>   | <0.01-fold; <0.01-fold     | regulator of Ub ligases                                    |
| <i>MAP7D2</i>   | <0.01-fold                 | putative microtubule-binding protein                       |
| <i>LCP1</i>     | 0.02                       | actin-binding protein; apparently activates T cells        |
| <i>SPINT2</i>   | 0.03                       | Kunitz type-2 serine peptidase inhibitor                   |
| <i>AFF2</i>     | 0.04                       | AF4/FMR2 family member-2; RNA-binding protein              |
| <i>SLC2A3</i>   | 0.06; 0.36                 | facilitated glucose transporter, member 3                  |
| <i>DDR2</i>     | 0.13                       | discoidin domain-containing receptor-2; a Tyr kinase       |
| <i>TENM1</i>    | 0.13                       | regulates, in particular, actin cytoskeletal network       |
| <i>PCDH9</i>    | 0.23; 0.40                 | protocadherin-9                                            |
| <i>SERPINF1</i> | 0.23                       | a serpin and regulator of neuronal differentiation         |
| <i>B4GALT6</i>  | 0.26; 0.10                 | synthesis of membrane-bound glycosphingolipids             |
| <i>RNF125</i>   | 0.29; 0.43                 | E3 Ub ligase; ubiquitylates a number of substrates         |
| <i>TLE4</i>     | 0.29; 0.28                 | TF; a corepressor that binds to a number of TFs            |
| <i>CYFIP2</i>   | 0.31                       | cytoplasmic FMR1-interacting protein-2                     |
| <i>GALNT1</i>   | 0.31                       | N-acetylgalactosaminyltransferase-1                        |
| <i>RUNX1T1</i>  | 0.31                       | TF; a corepressor that binds to a number of TFs            |
| <i>TPGS2</i>    | 0.31                       | subunit-2 of tubulin polyglutamylase complex               |
| <i>RPL22L1</i>  | 0.32                       | ribosomal protein L22-like 1, a ribosomal component        |
| <i>SLC7A11</i>  | 0.32                       | a cystine/glutamate transporter                            |
| <i>DACH1</i>    | 0.33                       | TF; mediates, in particular, organogenesis                 |
| <i>ELP2</i>     | 0.33                       | a component of RNA polymerase II elongator complex         |
| <i>ISL1</i>     | 0.33                       | TF; mediates, in particular, neuronal cell differentiation |
| <i>UBR1*</i>    | 0.33*                      | E3 Ub ligase; its gene is partly deleted in 2-KO cells*    |
| <i>TRAPPC8</i>  | 0.34                       | functions in trafficking from the ER to Golgi              |
| <i>DSG2</i>     | 0.35                       | component of intercellular desmosome junctions             |
| <i>DSC2</i>     | 0.35                       | another component of desmosome junctions                   |
| <i>RNF138</i>   | 0.35; 0.23                 | E3 Ub ligase, functions in DNA damage responses            |
| <i>CALCB</i>    | 0.36                       | calcitonin-related protein; induces vasodilation           |
| <i>DTNA</i>     | 0.36                       | dystrobrevin-alpha                                         |
| <i>SLC6A9</i>   | 0.36                       | importer of glycine, terminating its action at synapses    |
| <i>ZNF24</i>    | 0.36; 0.63                 | TF; functions include myelination of oligodendrocytes      |
| <i>ZNF521</i>   | 0.36                       | TF; functions include regulation of hematopoiesis          |
| <i>UBR2*</i>    | 0.37*                      | E3 Ub ligase; its gene is partly deleted in 2-KO cells*    |
| <i>ZSCAN30</i>  | 0.37                       | a zinc finger-containing putative TF                       |
| <i>C18orf21</i> | 0.38                       | uncharacterized protein                                    |
| <i>DSC3</i>     | 0.38                       | component of intercellular desmosome junctions             |
| <i>PLAT</i>     | 0.38                       | cleaves plasminogen, converting it to plasmin              |
| <i>MYO1C</i>    | 0.38                       | an "unconventional" myosin                                 |

**Fig. S5A.** Human mRNAs whose relative levels were decreased (from < 0.01 to 0.38) in 2-KO [*hsUBR1*<sup>-/-</sup> *hsUBR2*<sup>-/-</sup>] HEK293T cells (2-KO cell line #1) vs. wild-type cells, as measured by RNA-seq, and also, for indicated mRNAs, by <sup>32</sup>P-Northern hybridization or by RT-qPCR. This is the first part (A) of the multipart (A-C) Fig. S5. Asterisks by *UBR1*\* and *UBR2*\* (first column) refer to protein-ablating (Fig. 2A and *SI Appendix*, Fig. S10) (but not eliminating all *hsUBR1/hsUBR2* RNA) partial deletions of both *hsUBR1* and *hsUBR2* in 2-KO HEK293T cells (1). Values of fold-changes (second column) that were determined by either RNA-seq, <sup>32</sup>P-Northern, or RT-qPCR are, respectively, in black, red and green. In the third column, transcription factors (TF) and components of the ubiquitin-proteasome system are in red and blue, respectively. Functions of the cited proteins were compiled using entries in Uniprot (<https://www.uniprot.org/>) and/or GeneCards (<https://www.genecards.org/>). See also Fig. 2, the main text, and *SI Appendix*, Materials and Methods.

**(B)** mRNAs decreased (from 0.39 to 0.48) in [*UBR1*<sup>-/-</sup>*UBR2*<sup>-/-</sup>] cells

| Gene            | Fold-change, in 2-KO cells | Protein; functions                                      |
|-----------------|----------------------------|---------------------------------------------------------|
| <i>F2RL1</i>    | 0.39-fold                  | protease-activated receptor-2; functions in immunity    |
| <i>MAPRE2</i>   | 0.39                       | microtubule-associated protein RP/EB member-2           |
| <i>SLC8A1</i>   | 0.39                       | sodium/calcium exchanger-1                              |
| <i>EN2</i>      | 0.40; 0.49                 | TF; homeobox protein engrailed-2                        |
| <i>ZNF397</i>   | 0.40                       | TF; functions unknown                                   |
| <i>GAREM1</i>   | 0.41                       | regulates activation of the MAPK/ERK pathway            |
| <i>GPC3</i>     | 0.41                       | glypican-3; cell-surface proteoglycan                   |
| <i>NHSL1</i>    | 0.41                       | NHS-like protein-1; unknown functions                   |
| <i>RPRD1A</i>   | 0.41                       | binds to phosphorylated CTD domain of RNA Pol II        |
| <i>INO80C</i>   | 0.41                       | subunit of the NO80 chromatin remodeling complex        |
| <i>SLC39A6</i>  | 0.41                       | zinc transporter (ZIP6)                                 |
| <i>VCAN</i>     | 0.41                       | versican protein; a role in cell-matrix connections     |
| <i>ZBED6CL</i>  | 0.41                       | encoded by a DNA transposon; unclear functions          |
| <i>PANX2</i>    | 0.42                       | pannexin-2                                              |
| <i>SLITRK5</i>  | 0.42                       | suppresses neurite outgrowth                            |
| <i>TTC26</i>    | 0.42                       | required for transport of proteins in the motile cilium |
| <i>YBX1</i>     | 0.42                       | TF; multifunctional DNA/RNA-binding regulator           |
| <i>CABLES1</i>  | 0.43                       | CDK kinase-binding regulatory protein                   |
| <i>GPC6</i>     | 0.43                       | a cell-surface proteoglycan                             |
| <i>CDH2</i>     | 0.44; 0.52                 | a calcium-dependent cell adhesion protein               |
| <i>INSIG1</i>   | 0.44                       | mediates feedback control of cholesterol synthesis      |
| <i>OSBPL1A</i>  | 0.44                       | oxysterol-binding protein-related protein-1             |
| <i>RUSC2</i>    | 0.44                       | RUN and SH3 domains-containing protein-2                |
| <i>SLC37A3</i>  | 0.44                       | sugar-phosphate exchanger-3                             |
| <i>SLAIN1</i>   | 0.44                       | microtubule plus-end tracking protein                   |
| <i>TBC1D4</i>   | 0.44                       | a GTPase-activating protein for RAB-family proteins     |
| <i>THRB</i>     | 0.44                       | thyroid hormone receptor-beta                           |
| <i>TMEM178B</i> | 0.44                       | transmembrane protein 178B; unknown functions           |
| <i>LMBR1</i>    | 0.45                       | transmembrane protein; functions unclear                |
| <i>PRDM6</i>    | 0.45                       | putative histone methyltransferase                      |
| <i>TAOK3</i>    | 0.45                       | Ser/Thr-kinase and regulator of p38/MAPK14 cascade      |
| <i>TSHZ3</i>    | 0.45                       | TF; functions as a gene repressor during development    |
| <i>MIER2</i>    | 0.46                       | mesoderm induction early response protein-2             |
| <i>PAPSS2</i>   | 0.46                       | 3'-phosphoadenosine 5'-phosphosulfate synthase-2        |
| <i>FHOD3</i>    | 0.47                       | actin-organizing protein                                |
| <i>FLRT3</i>    | 0.47                       | functions in cell-cell adhesion and axon guidance       |
| <i>BAX</i>      | 0.48                       | regulator of apoptosis                                  |
| <i>DIS3</i>     | 0.48                       | exoribonuclease                                         |

**Fig. S5B.** Continuation of Fig. S5A. Human mRNAs whose relative levels were decreased (from 0.39 to 0.48) in 2-KO [*hsUBR1*<sup>-/-</sup>*hsUBR2*<sup>-/-</sup>] HEK293T cells (2-KO cell line #1) vs. wild-type HEK293T cells, as measured by RNA-seq, and also, for indicated mRNAs, by RT-qPCR. Values of fold-changes (second column) that were determined by RNA-seq and by RT-qPCR are in black and green, respectively. In the third column, transcription factors (TF) and components of the ubiquitin-proteasome system are, respectively, in red and blue. Functions of the cited proteins were compiled using entries in Uniprot (<https://www.uniprot.org/>) and/or GeneCards (<https://www.genecards.org/>). See also Fig. 2, the main text, and *SI Appendix*, Materials and Methods.

**(C)** mRNAs **decreased** (from 0.48 to 0.50) in [*UBR1*<sup>-/-</sup> *UBR2*<sup>-/-</sup>] cells

| Gene            | Fold-change, in 2-KO cells | Protein; functions                                     |
|-----------------|----------------------------|--------------------------------------------------------|
| <i>FKBP10</i>   | 0.48-fold                  | peptidyl-prolyl cis-trans isomerase                    |
| <i>GPR180</i>   | 0.48                       | a G protein-coupled receptor                           |
| <i>LRATD2</i>   | 0.48                       | a transmembrane protein; functions unknown             |
| <i>OBSCN</i>    | 0.48                       | obscurin, a structural protein in striated muscle      |
| <i>ABCB8</i>    | 0.49                       | ATP-binding subunit of a mitochondrial K-channel       |
| <i>ATP6V0E2</i> | 0.49                       | a subunit of a vacuolar-type acidifying ATPase         |
| <i>KLF12</i>    | 0.49                       | TF; a Krueppel-like transcriptional repressor          |
| <i>MAF</i>      | 0.49; 0.65                 | TF; functions as either activator or repressor         |
| <i>MCC</i>      | 0.49                       | a tumor suppressor and regulator of the Wnt pathway    |
| <i>NR2F1</i>    | 0.49                       | TF; functions as either activator or repressor         |
| <i>TMED7</i>    | 0.49                       | a transmembrane protein; roles in vesicular transport  |
| <i>ZYX</i>      | 0.49                       | zyxin; an adhesion plaque protein; binds alpha-actinin |
| <i>AP1S2</i>    | 0.50                       | a subunit of clathrin-associated adaptor complex       |
| <i>CITED1</i>   | 0.50                       | TF; coactivator of the p300/CBP complex                |
| <i>GPX8</i>     | 0.50                       | a probable glutathione peroxidase                      |
| <i>LHFPL2</i>   | 0.50                       | functions in female and male fertility                 |
| <i>RPS23</i>    | 0.50                       | ribosomal protein of the 40S ribosomal subunit         |

**Fig. S5C.** Continuation of Fig. S5A, B. Human mRNAs whose relative levels were decreased (from 0.48 to 0.50) in 2-KO [*hsUBR1*<sup>-/-</sup> *hsUBR2*<sup>-/-</sup>] HEK293T cells (2-KO cell line #1) vs. wild-type HEK293T cells, as measured by RNA-seq, and also, for one mRNA, by RT-qPCR. Values of fold-changes (second column) that were determined by RNA-seq and by RT-qPCR are in black and green, respectively. In the third column, transcription factors (TF) and components of the ubiquitin-proteasome system are, respectively, in red and blue. Functions of the cited proteins were compiled using entries in Uniprot (<https://www.uniprot.org/>) and/or GeneCards (<https://www.genecards.org/>). See also Fig. 2, the main text, and *SI Appendix*, Materials and Methods.



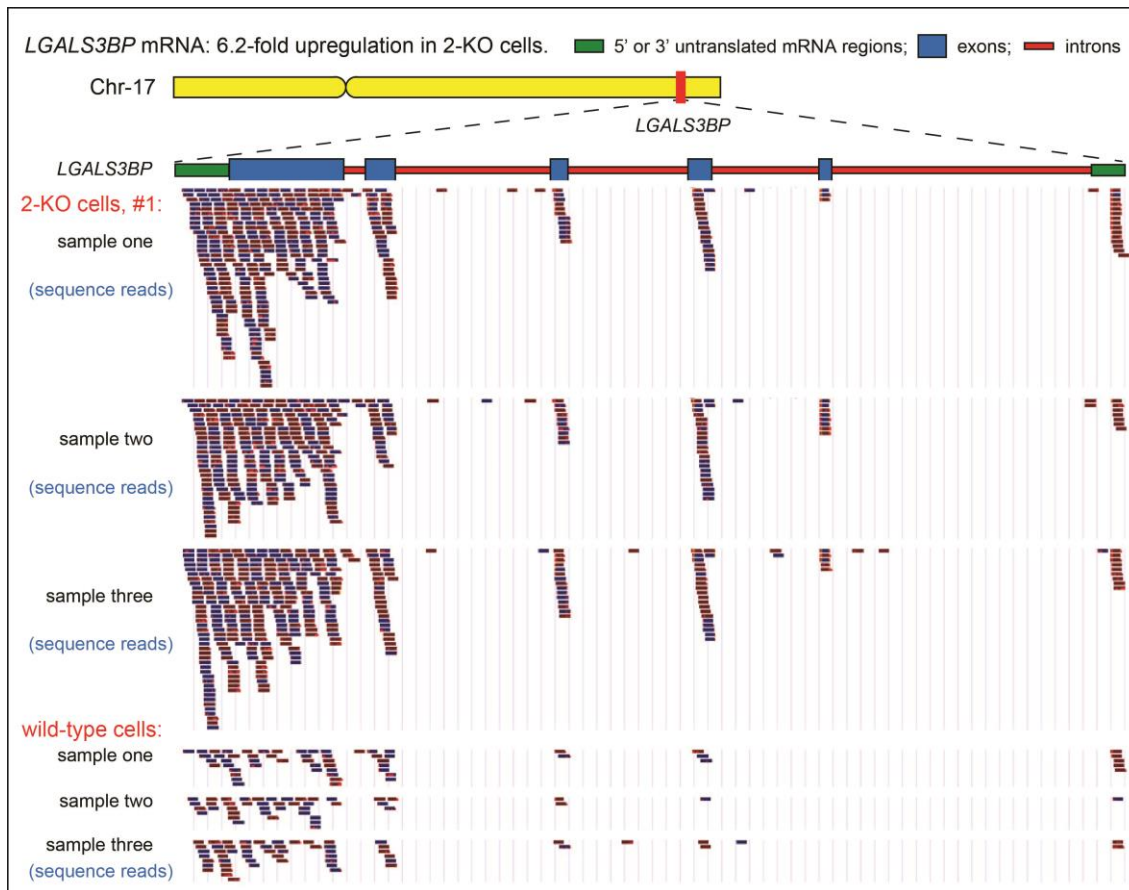

**Fig. S6.** Sets of sequence “reads”, by genome-wide, Illumina instrument-based RNA-seq measurements, for the example of human *LGALS3BP* mRNA in 2-KO [*hsUBR1*<sup>-/-</sup> *hsUBR2*<sup>-/-</sup>] HEK293T cells (2-KO cell line #1) (upper three sets) vs. wild-type HEK293T cells (lower three sets), as indicated on the diagram. *LGALS3BP* encodes a protein that functions in cell adhesion and immune responses. *LGALS3BP* mRNA was increased by ~6-fold in 2-KO cells, relative to wild-type cells (Fig. 2D and *SI Appendix*, Fig. S4). *LGALS3BP* is located on the long arm of human chromosome 17. The intron-exon configuration of the *LGALS3BP* gene is also shown, with introns (to scale) in red. As would be expected, given the RNA-seq technology and its use for mRNA quantification (2-4), virtually all sequence reads for *LGALS3BP* are confined to its mRNA’s protein-coding exons (in blue) or to mRNA’s 5’- and 3’-noncoding regions (in green) in both 2-KO and wild-type cells. Note the relative scarcity of sequence reads for wild-type cells (the lower three sets), in which the level of *LGALS3BP* mRNA is 6.2-fold lower than in 2-KO cells. See also the main text, Fig. 2D, and *SI Appendix*, Fig. S4.

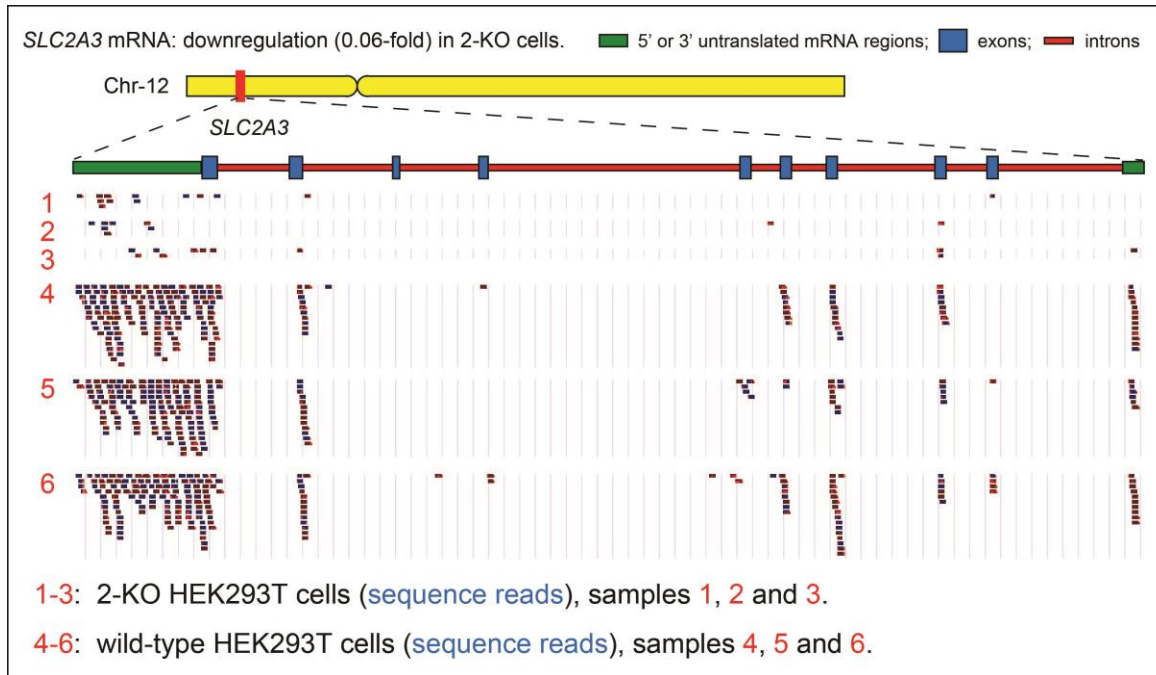

**Fig. S7.** Second example (see Fig. S6 for the first one) of sequence “reads”, by genome-wide, Illumina instrument-based RNA-seq measurements of human *SLC2A3* mRNA in 2-KO [*hsUBR1*<sup>-/-</sup> *hsUBR2*<sup>-/-</sup>] HEK293T cells (2-KO cell line #1) (upper three sets, 1-3) vs. wild-type cells (lower three sets, 1-3), as indicated on the diagram. *SLC2A3* encodes a glucose transporter (Fig. 2D and *SI Appendix*, Fig. S5A). In contrast to *LGALS3BP* mRNA (*SI Appendix*, Fig. S6), which was increased by ~6-fold in 2-KO cells, relative to wild-type cells, *SLC2A3* mRNA was decreased by ~16-fold in 2-KO cells (Fig. 2D and *SI Appendix*, Fig. S5A). The *SLC2A3* gene is located on the short arm of human chromosome 12. The intron-exon configuration of *SLC2A3* is also shown, with introns (to scale) in red. As would be expected, given the RNA-seq technique and its use for mRNA quantification, virtually all sequence reads for *SLC2A3* are confined to its mRNA’s protein-coding exons (in blue) or to mRNA’s 5’- and 3’-noncoding regions (in green) in both 2-KO and wild-type cells. Note the scarcity of sequence reads for 2-KO cells (the upper three sets), in which the level of *SLC2A3* mRNA is ~16-fold lower than in wild-type cells, a pattern “opposite” to the one for the *LGALS3BP* gene, in *SI Appendix*, Fig. S6. See also the main text, Fig. 2D, and *SI Appendix*, Fig. S5A.

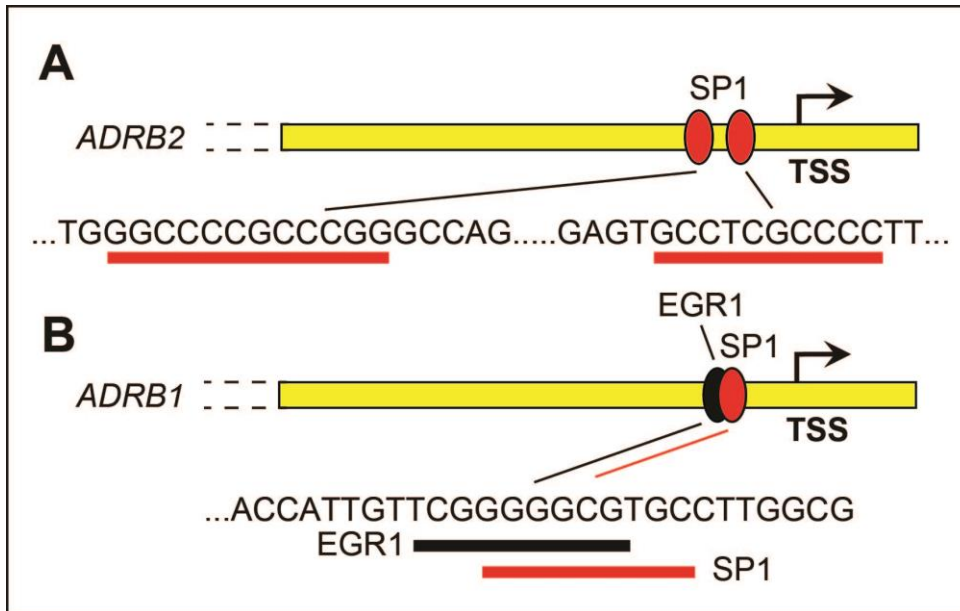

**Fig. S8.** Promoters of the human *hsADRB1* and *hsADRB2* genes. Only TSS (main transcription start site)-proximal regions are shown. (A) *hsADRB2* contains two sites for the *hsSP1* activator TF (red ovals) and also, potentially importantly, lacks the binding site for the *hsEGR1* repressor TF (black oval in *hsADRB1*) (5-9). (B) *hsADRB1* contains one *hsSP1* site and the partially overlapping *hsEGR1* site, so that the binding of *hsSP1* activator and *hsEGR1* repressor to *hsADRB1* is expected to be mutually exclusive. This working model, which remains to be verified experimentally, may account, at least in part, for the observed 17-fold increase of *hsADRB2* mRNA but not of *hsADRB1* mRNA in 2-KO HEK293T cells (see the main text, Fig. 2, and *SI Appendix*, Fig. S4). DNA sequences of (overlapping) sites that are recognized by *hsSP1* and *hsEGR1* are underlined in red and black, respectively. Not shown are several non-*hsSP1*, non-*hsEGR1* TF-binding sites that do not differ significantly between *hsADRB1* and *hsADRB2*.

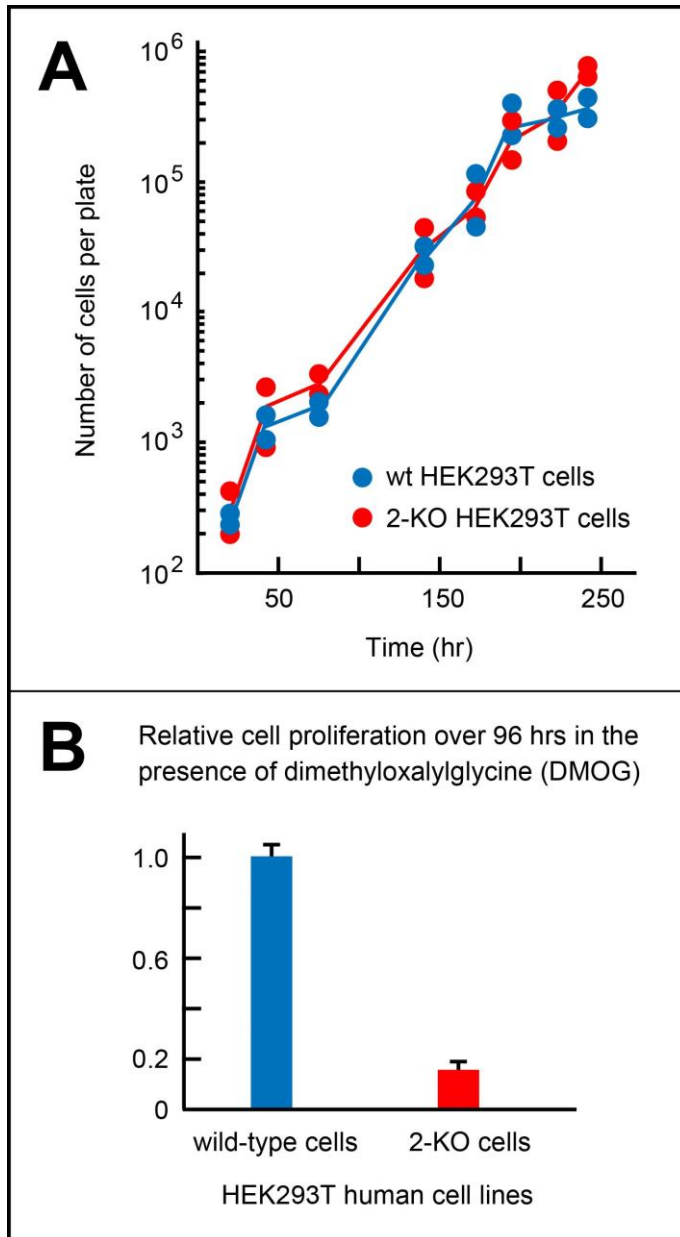

**Fig. S9.** Human 2-KO [*hsUBR1*<sup>-/-</sup> *hsUBR2*<sup>-/-</sup>] HEK293T cells, which overexpress both *hsMCT2* (*hsSLC16A7*) mRNA and *hsMCT2* protein (a monocarboxylate transporter) (Fig. 2 and *SI Appendix*, Figs. S4 and S12A), are hypersensitive to dimethyloxalyglycine (DMOG). (A) Similar growth rates of wild-type and 2-KO HEK293T cells under normal conditions. Duplicate samples of wild-type and 2-KO cells were seeded onto plates, and their numbers were determined as a function of time, as described in *SI Appendix*, Materials and Methods. (B) Hypersensitivity of 2-KO HEK293T cells to dimethyloxalyglycine (DMOG), whose derivative methyloxalyglycine (MOG) is transferred into cells largely by the *hsMCT2* (*hsSLC16A7*) transporter (Fig. 2 and *SI Appendix*, Figs. S4 and S12A). See the main text for biochemical strategy and rationale of this assay.

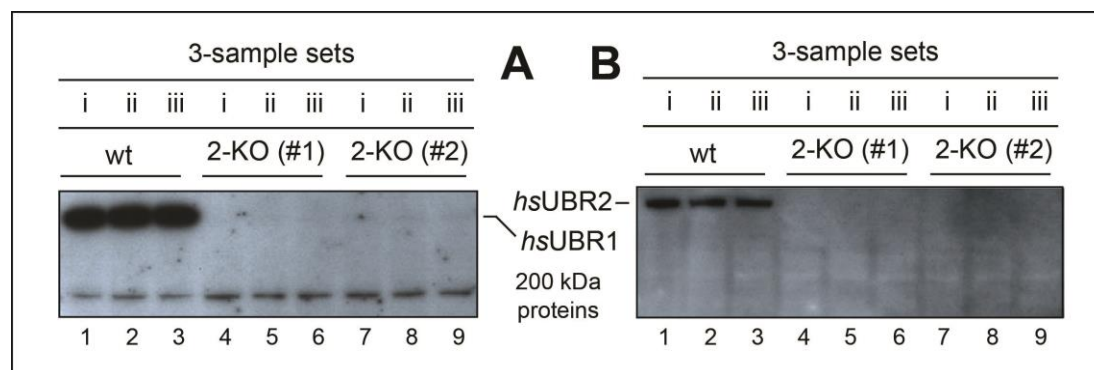

**Fig. S10.** Immunoblot (IB) analyses, using anti-UBR1 and anti-UBR2 antibodies, of extracts from 2-KO [*hsUBR1*<sup>-/-</sup> *hsUBR2*<sup>-/-</sup>] HEK293T cells and their wild-type counterparts prior to proteome-wide mass spectrometric (TMT-SPS-MS3) comparisons of these extracts. (A) Lanes 1-3, IB, with antibody to *hsUBR1*, of three extracts from three independently grown samples (i-iii) of wild-type HEK293T cells. Lanes 4-6, same as lanes 1-3, but with extracts from three samples of 2-KO HEK293T cells (2-KO cell line #1). Lanes 7-9, same as lanes 4-6 but with 2-KO cell line #2. (B) Lanes 1-9, same as lanes 1-9 in A, but IB with antibody to *hsUBR2*. See *SI Appendix*, Materials and Methods for additional details.

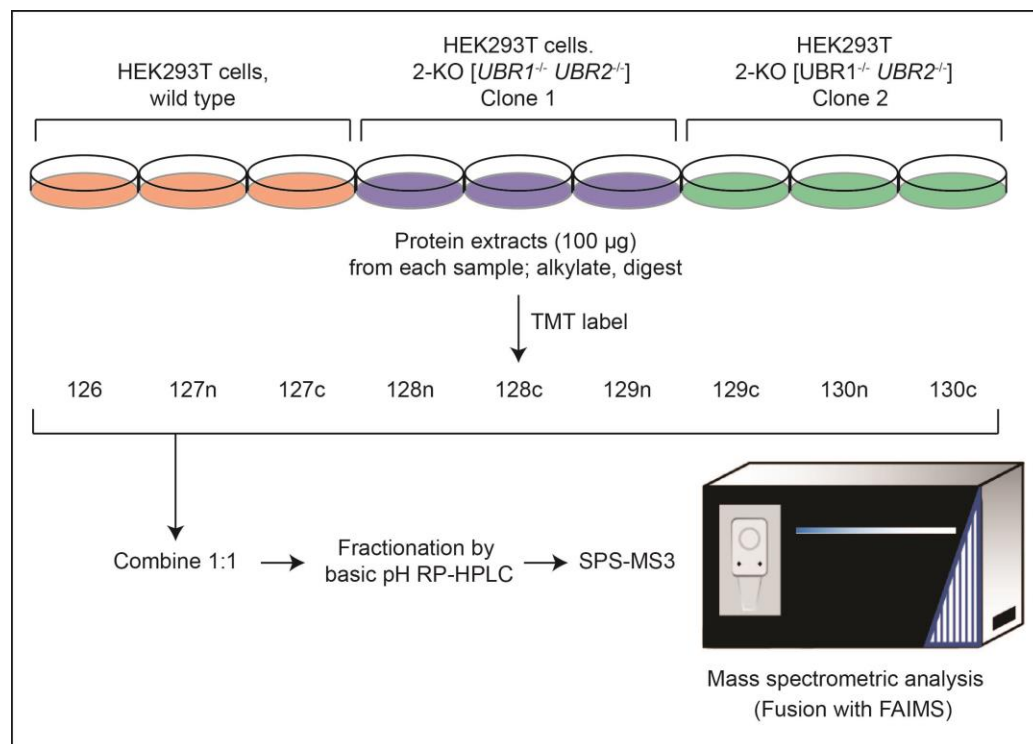

**Fig. S11.** Summary of MS analyses using TMT-SPS-MS3 (10). See *SI Appendix, Materials and Methods* for additional details.

**(A)** MS analyses: proteins **upregulated** by 2-fold or more in [*UBR1*<sup>-/-</sup> *UBR2*<sup>-/-</sup>] HEK293T cells

| Protein  | Fold-change, in 2-KO cell line #1 | Fold-change, in 2-KO cell line #2 | RNA-seq, in #1, fold-change | Protein; functions                                   |
|----------|-----------------------------------|-----------------------------------|-----------------------------|------------------------------------------------------|
| MCT2     | 6.0-fold                          | 2.7-fold                          | 22-fold                     | SLC16A7; monocarboxylate transporter                 |
| LRRRC58  | 4.2                               | 3.3                               | NA*                         | a protein containing leucine-rich repeats            |
| MAMLD1   | 3.0                               | 1.6                               | 2.3                         | <b>TF; activates the promoter of HES3 gene</b>       |
| AP3B2    | 2.9                               | 2.1                               | NA*                         | subunit of non-clathrin AP3 adaptor complex          |
| STMN3    | 2.9                               | 3.5                               | 0.65                        | stathmin-3; microtubule-destabilizing activity       |
| CKMT1A   | 2.7                               | 2.7                               | NA*                         | mitochondrial creatine kinase, U-type                |
| DPYSL4   | 2.7                               | 1.3                               | NA*                         | a role in signaling by class 3 semaphorins           |
| CENPV    | 2.6                               | 1.7                               | NA*                         | a component of chromosomal centromeres               |
| SDCCAG8  | 2.6                               | 2.2                               | NA*                         | a role in ciliogenesis and Hedgehog pathway          |
| NQO1     | 2.5                               | 1.4                               | NA*                         | a quinone reductase; detoxification pathways         |
| SARM1    | 2.5                               | 2.0                               | NA*                         | NAD(+) hydrolase; a role in axonal degeneration      |
| DCLK2    | 2.5                               | 1.2                               | NA*                         | Ser/Thr-kinase; reduced affinity for camodulin(Ca)   |
| CRYL1    | 2.4                               | 2.0                               | NA*                         | a homolog of lambda-crystallin                       |
| DLGAP5   | 2.4                               | 1.3                               | NA*                         | a spindle-localized potential cell cycle regulator   |
| INA      | 2.4                               | 1.2                               | 2.6                         | alpha-internexin; subunit of some neurofilaments     |
| PPDPF    | 2.4                               | 1.2                               | NA*                         | a regulator of exocrine pancreas development         |
| SLC25A29 | 2.3                               | 1.5                               | 1.6                         | mitochondrial transporter of basic amino acids       |
| VIPR1    | 2.3                               | 1.2                               | 1.6                         | a receptor for vasoactive intestinal peptide (VIP)   |
| ACAD11   | 2.3                               | 1.4                               | NA*                         | an acyl-CoA dehydrogenase                            |
| DNAJB5   | 2.4                               | 1.2                               | NA*                         | a DNAJ-like chaperone                                |
| GNG4     | 2.3                               | 2.8                               | 1.3                         | a gamma-subunit of specific G proteins               |
| TBC1D5   | 2.6                               | 1.2                               | 1.5                         | a putative GTPase-activating protein (GAP)           |
| PXDN     | 2.2                               | 1.6                               | 1.9                         | a sequelog of peroxidasin; unknown functions         |
| TRPM5    | 2.2                               | 1.6                               | NA*                         | Ca(2+)-activated, monovalent cation channel          |
| NECAB3   | 2.2                               | 2.3                               | NA*                         | EF-hand calcium-binding protein-3                    |
| RBKS     | 2.2                               | 1.9                               | NA*                         | ribokinase; phosphorylation of ribose at oxygen-5    |
| NFIC     | 2.2                               | 1.6                               | 1.8                         | <b>TF; recognizes 5'-TTGGCNNNNNGCCAA-3'</b>          |
| BPHL     | 2.2                               | 1.8                               | 1.8                         | valacyclovir hydrolase; a likely detoxifying enzyme  |
| CBX5     | 2.1                               | 1.6                               | 1.5                         | histone reader, recognizing methylated histone H3    |
| MYEF2    | 2.1                               | 1.4                               | 1.5                         | <b>TF; represses myelin basic protein (MBP) gene</b> |
| ERAP2    | 2.1                               | 1.3                               | NA*                         | aminopeptidase in the ER, and also in the cytosol    |
| ENPP5    | 2.1                               | 1.4                               | NA*                         | ectonucleotide phosphodiesterase                     |

**Fig. S12A.** MS analyses, using TMT-SPS-MS3 (10). Human proteins whose relative levels were increased (from 6-fold to 2.1-fold) in 2-KO [*hsUBR1*<sup>-/-</sup> *hsUBR2*<sup>-/-</sup>] HEK293T cells (2-KO cell line #1 and 2-KO cell line #2) vs. wild-type HEK292T cells, are cited in the second and third columns, respectively. The entries are cited in the order of fold-values determined for 2-KO cell line #1 vs. wild-type HEK293T cells. Fold-values for the corresponding mRNAs, determined by RNA-seq (with RNA from 2-KO cell line #1 vs. RNA from wild-type cells) are cited in the fourth column. NA\* (“not applicable”) refers to the absence of detectable mRNA levels in both 2-KO and wild-type cell lines. In the fifth column, transcription factors (TFs) are denoted in red. Functions of the cited proteins were compiled using entries in Uniprot (<https://www.uniprot.org/>) and/or GeneCards (<https://www.genecards.org/>). See also Fig. 2, the main text, and *SI Appendix*, Materials and Methods.

Note qualitative agreement between the finding of upregulated (by 22-fold) *hsMCT2* mRNA (encoding a monocarboxylate transporter; Fig. 2 and *SI Appendix*, Fig. S4) and the also upregulated *hsMCT2* protein (by 6-fold and 2.7-fold, in 2-KO cell lines), as determined by MS. See the main text for additional details.

**(B)** MS analyses: proteins **upregulated** by 2-fold or more in [*UBR1*<sup>-/-</sup> *UBR2*<sup>-/-</sup>] HEK293T cells

| Protein  | Fold-change, in 2-KO cell line #1 | Fold-change, in 2-KO cell line #2 | RNA-seq, in #1, fold-change | Protein; functions                                |
|----------|-----------------------------------|-----------------------------------|-----------------------------|---------------------------------------------------|
| SERPINI1 | 2.1-fold                          | 2.5-fold                          | 3.6                         | neuroserpin, a serine protease inhibitor          |
| PYGL     | 2.1                               | 1.4                               | 1.3                         | glycogen phosphorylase                            |
| CAV1     | 2.0                               | 1.8                               | 1.7                         | a scaffolding protein within caveolar membranes   |
| AGMAT    | 2.0                               | 1.1                               | 2.1                         | agmatinase; from agmatine to putrescine           |
| A2M      | 2.0                               | 2.8                               | NA*                         | alpha-2-macroglobulin, a protease inhibitor       |
| BICC1    | 2.0                               | 1.8                               | 1.5                         | RNA-binding protein; a regulator of Wnt signaling |
| HSPA1L   | 2.0                               | 1.8                               | NA*                         | one of Hsp70 chaperones                           |
| CNRIP1   | 2.0                               | 1.4                               | 1.6                         | a cannabinoid receptor-interacting protein        |
| CAP2     | 2.0                               | 1.3                               | NA*                         | a protein that interacts with adenylyl cyclase    |
| SMPD1    | 2.0                               | 0.8                               | NA*                         | enzyme that converts sphingomyelin to ceramide    |
| PLA2G6   | 1.9                               | 2.5                               | NA*                         | calcium-independent phospholipase A2              |

**Fig. S12B.** Continuation of Fig. S12A. MS analyses, using TMT-SPS-MS3 (10). Human proteins whose relative levels were increased (from 2.1-fold to 2.0-fold) in 2-KO [*hsUBR1*<sup>-/-</sup> *hsUBR2*<sup>-/-</sup>] HEK293T cells (2-KO cell line #1 and 2-KO cell line #2) vs. wild-type HEK293T cells are cited in the second and third columns, respectively. The entries are cited in the order of fold-values determined for 2-KO cell line #1 vs. wild-type HEK293T cells. Fold-values for the corresponding mRNAs, determined by RNA-seq (with RNA from 2-KO cell line #1 vs. RNA from wild-type cells) are cited in the fourth column. NA\* (“not applicable”) refers to the absence of detectable mRNA levels in both 2-KO and wild-type cell lines. Functions of the cited proteins were compiled using entries in Uniprot (<https://www.uniprot.org/>) and/or GeneCards (<https://www.genecards.org/>). See also Fig. 2, the main text, and *SI Appendix*, Materials and Methods.

Although, the last entry, *hsPLA2G6* (calcium-independent phospholipase A2), was upregulated, according to MS data, by less than 2-fold in 2-KO cell line #1, it was upregulated by 2.5-fold in 2-KO cell line #2. In addition, *hsPLA2G6* is a protein whose natural fragments, produced by caspases under apoptotic and other conditions, are likely to be substrates of the Arg/N-degron pathway (11, 12).



**(A)** MS analyses: proteins **decreased** (from <0.01 to 0.36) in [*UBR1*<sup>-/-</sup> *UBR2*<sup>-/-</sup>] cells

| Protein   | Fold-change, in 2-KO cell line #1 | Fold-change, in 2-KO cell line #2 | RNA-seq, in #1, fold-change | Protein; functions                                    |
|-----------|-----------------------------------|-----------------------------------|-----------------------------|-------------------------------------------------------|
| MAGEA6/10 | <0.01-fold                        | <0.01-fold                        | NA*                         | MAGEA6 & 10 are highly sequelogenous; see legend      |
| FAM84B    | <0.02-fold                        | 0.04-fold                         | 0.48                        | (LRATD2); often overexpressed in cancers              |
| NF-M      | 0.06                              | 0.06                              | 1.7                         | (NFEM); subunit of neurofilaments                     |
| NF-L      | 0.06                              | 0.05                              | 1.2                         | (NFEL); another subunit of neurofilaments             |
| RENBP     | 0.07                              | 0.06                              | NA*                         | N-acylglucosamine 2-epimerase                         |
| MYOM2     | 0.10                              | 0.23                              | NA*                         | myomesin-2, a component of myofibrillar M-band        |
| DPYSL3    | 0.14                              | 0.10                              | NA*                         | functions in cell migration and axon guidance         |
| KCTD12    | 0.16                              | 0.15                              | 0.56                        | auxiliary subunit of GABA receptors                   |
| MOCOS     | 0.16                              | 0.13                              | 0.35                        | sulfurates the molybdenum cofactor                    |
| MAP7D2    | 0.16                              | 0.19                              | <0.01                       | putative microtubule-binding protein                  |
| CDYL2     | 0.16                              | 0.09                              | NA*                         | ribokinase; phosphorylation of ribose at oxygen-5     |
| POTEI     | 0.18                              | 0.17                              | NA*                         | an ankyrin domain family member                       |
| PCDH9     | 0.19                              | 0.19                              | 0.23                        | protocadherin-9, a cell adhesion protein              |
| DACH1     | 0.20                              | 0.35                              | 0.26                        | <b>TF; mediates, in particular, organogenesis</b>     |
| ICAM1     | 0.22                              | 0.20                              | NA*                         | a ligand for for leukocyte adhesion protein LFA1      |
| SH2D4A    | 0.23                              | 0.27                              | 0.33                        | inhibits estrogen-induced cell proliferation          |
| APOBEC3B  | 0.27                              | 0.04                              | 0.51                        | dU-editing enzyme (cytidine deaminase)                |
| SLITRK5   | 0.28                              | 0.28                              | 0.42                        | suppresses neurite outgrowth                          |
| KLF5      | 0.29                              | 0.40                              | 0.55                        | <b>TF; Kruppel-like; binds to GC-box promoters</b>    |
| GAREM     | 0.29                              | 0.30                              | 0.41                        | GRB2-associated; regulator of MAPK protein 1          |
| GALNT1    | 0.30                              | 0.28                              | 0.31                        | mediates O-linked oligosaccharide biosynthesis        |
| LCP1      | 0.31                              | 0.19                              | 0.02                        | activation of T cells                                 |
| DTNA      | 0.32                              | 0.34                              | 0.36                        | dystrobrevin-alpha; a role in synapses                |
| MCC       | 0.33                              | 0.52                              | 0.49                        | putative colorectal tumor suppressor, at 5q21         |
| RBM47     | 0.33                              | 0.44                              | 0.50                        | RNA-binding protein; unknown functions                |
| COL14A1   | 0.34                              | 0.26                              | 0.41                        | collagen alpha-1 (XIV) chain                          |
| PRDM6     | 0.34                              | 0.68                              | 0.45                        | <b>TF; repressor of smooth muscle gene expression</b> |
| BAX       | 0.36                              | 0.58                              | 0.48                        | regulator of mitochondria-mediated apoptosis          |

**Fig. S13A.** MS analyses, using TMT-SPS-MS3 (10). Human proteins whose levels were decreased (from <0.01-fold to 0.36-fold) in 2-KO HEK293T cells (2-KO cell line #1 and 2-KO cell line #2) vs. wild-type HEK292T cells are cited in the second and third columns, respectively. The entries are cited in the order of fold-values determined for 2-KO cell line #1 vs. wild-type HEK293T cells. Fold-values for corresponding mRNAs, determined by RNA-seq (with RNA from 2-KO cell line #1 vs. RNA from wild-type cells) are cited in the fourth column. NA\* (“not applicable”) refers to the absence of detectable mRNA levels in both 2-KO and wild-type cell lines. In the fifth column, transcription factors (TFs) are denoted in red. Functions of the cited proteins were compiled using entries in Uniprot (<https://www.uniprot.org/>) and/or GeneCards (<https://www.genecards.org/>). See also Fig. 2, the main text, and *SI Appendix*, Materials and Methods.

See the main text for discussion of the observed, by MS, of a strong downregulation (<0.01-fold) *hsMAGEA6* and/or *hsMAGEA10*. The two proteins are 49% identical and distinguishing between them by MS is not a straightforward task. Hence, NA\* (“not applicable”) in the fourth column in regard to a corresponding mRNA fold-value, although *hsMAGEA6* mRNA was shown, using both RNA-seq and <sup>32</sup>P-Northern, to be strongly (<0.01-fold) downregulated in both 2-KO cell line #1 and 2-KO cell line #2, in comparison to wild-type HEK293T cells (Fig. 2E, D). It is likely (but remains to be verified), that an *hsMAGEA6/10* protein that was strongly (<0.01-fold) downregulated in 2-KO cells was, in fact, the *hsMAGEA6* protein. We do not know, as yet, whether *hsMAGEA10* mRNA was also downregulated in 2-KO cells, similarly to *hsMAGEA6* mRNA (Fig. 2E, D).

**(B)** MS analyses: proteins **decreased** (from 0.36 to 0.42) in [*UBR1*<sup>-/-</sup>*UBR2*<sup>-/-</sup>] cells

| Protein | Fold-change, in 2-KO cell line #1 | Fold-change, in 2-KO cell line #2 | RNA-seq, in #1, fold-change | Protein; functions                                        |
|---------|-----------------------------------|-----------------------------------|-----------------------------|-----------------------------------------------------------|
| SNX18   | 0.36-fold                         | 0.59-fold                         | 0.59                        | endocytosis and intracellular vesivle trafficking         |
| PRAME   | 0.36                              | 0.49                              | NA*                         | <b>TF; inhibits signaling by retinoic acid</b>            |
| HLA-DMA | 0.37                              | 0.19                              | NA*                         | functions in releasing CLIP peptide from MHC II           |
| ATP2B4  | 0.37                              | 0.30                              | 0.73                        | ATPase; exports calcium ions from cells                   |
| MYO1C   | 0.37                              | 0.39                              | 0.38                        | unconventional myosin; role in insulin pathways           |
| FKBP10  | 0.37                              | 0.24                              | 0.48                        | peptidyl-prolyl cis-trans isomerase                       |
| PIP     | 0.37                              | 0.36                              | NA*                         | prolactin-iducible protein; unknown functions             |
| KLHL11  | 0.37                              | 0.41                              | NA*                         | <b>subunit of a cullin-RING-based E3 ubiquitin ligase</b> |
| CA2     | 0.37                              | 0.87                              | NA*                         | carbonic anhydrase-2                                      |
| RASSF5  | 0.38                              | 0.31                              | NA*                         | RAS-like protein; possible tumor suppressor               |
| DSG2    | 0.38                              | 0.39                              | 0.35                        | component of intercellular desmosome junctions            |
| RNF138  | 0.39                              | 0.51                              | 0.35                        | <b>E3 ubiquitin ligase; role in DNA damage response</b>   |
| GPC6    | 0.39                              | 0.30                              | 0.43                        | component of cell surface proteoglycan                    |
| SULT1A3 | 0.39                              | 0.23                              | NA*                         | sulfotransferase; substrates include dopamine             |
| FBXO17  | 0.40                              | 0.80                              | 0.55                        | <b>recognition component of SCF ubiquitin ligase</b>      |
| TPD52L1 | 0.40                              | 0.41                              | NA*                         | unknown functions                                         |
| TMEM97  | 0.40                              | 0.40                              | NA*                         | intracellular protein that binds to numerous drugs        |
| BCAM    | 0.40                              | 0.78                              | NA*                         | receptor for laminin alpha-5                              |
| TBC1D4  | 0.40                              | 0.49                              | NA*                         | may be a specific GTPase-activating protein               |
| DSC2    | 0.40                              | 0.35                              | 0.35                        | component of intercellular desmosome junctions            |
| RPRD1A  | 0.41                              | 0.39                              | 0.41                        | regulator of RNA polymerase II                            |
| RBPM52  | 0.41                              | 0.46                              | NA*                         | RNA-binding protein; roles in cell differentiation        |
| QPCT    | 0.49                              | 0.26                              | 0.31                        | bosynthesis of pyroglutamyl peptides                      |
| SLC16A2 | 0.41                              | 0.25                              | 1.4                         | thyroid hormone transporter                               |
| MRM1    | 0.41                              | 0.37                              | NA*                         | methylates mitochondrial rRNA                             |
| ARHGAP8 | 0.41                              | 0.95                              | NA*                         | GTPase activator for specific Rho-type GTPases            |
| TGM2    | 0.42                              | 0.28                              | NA*                         | catalyzes cross-linking of specific proteins              |
| KLC3    | 0.42                              | 0.53                              | NA*                         | light chain of kinesin, a microtubule-bound enzyme        |

**Fig. S13B.** Continuation of Fig. S13A. MS analyses, using TMT-SPS-MS3 (10). Human proteins whose relative levels were decreased (from <0.36-fold to 0.42-fold) in 2-KO [*hsUBR1*<sup>-/-</sup> *hsUBR2*<sup>-/-</sup>] HEK293T cells (2-KO cell line #1 and 2-KO cell line #2) vs. wild-type HEK293T cells are cited in the second and third columns, respectively. The entries are cited in the order of fold-values determined for 2-KO cell line #1 vs. wild-type HEK293T cells. Fold-values for corresponding mRNAs, determined by RNA-seq (with RNA from 2-KO cell line #1 vs. RNA from wild-type cells) are cited in the fourth column. NA\* (“not applicable”) refers to the absence of detectable mRNA levels in both 2-KO and wild-type cell lines. In the fifth column, transcription factors (TFs) and components of the ubiquitin-proteasome system are in red and blue, respectively. Functions of the cited proteins were compiled using entries in Uniprot (<https://www.uniprot.org/>) and/or GeneCards (<https://www.genecards.org/>). See also Fig. 2 and *SI Appendix*, Materials and Methods.

**(C)** MS analyses: proteins **decreased** (from 0.42 to 0.47) in [*UBR1*<sup>-/-</sup>*UBR2*<sup>-/-</sup>] cells

| Protein | Fold-change, in 2-KO cell line #1 | Fold-change, in 2-KO cell line #2 | RNA-seq, in #1, fold-change | Protein; functions                                           |
|---------|-----------------------------------|-----------------------------------|-----------------------------|--------------------------------------------------------------|
| HOXA13  | 0.42-fold                         | 0.64-fold                         | 0.50                        | <b>TF; contributes to specifying anterior-posterior axis</b> |
| BBS10   | 0.42                              | 0.44                              | NA*                         | probable molecular chaperone                                 |
| MAPRE2  | 0.42                              | 0.40                              | 0.39                        | microtubule-associated protein, of RP/EB family              |
| CRABP2  | 0.42                              | 0.46                              | 1.41                        | transports retinoic acid to the nucleus                      |
| GSTK1   | 0.43                              | 0.51                              | 0.61                        | glutathione S-transferase kappa-1                            |
| CPPED1  | 0.43                              | 0.24                              | NA*                         | Ser/Thr-protein phosphatase                                  |
| DUSP9   | 0.43                              | 0.45                              | NA*                         | dual-specificity protein phosphatase-9                       |
| HPCAL4  | 0.44                              | 0.40                              | NA*                         | hippocalcin-like protein-4; unknown functions                |
| RSAD1   | 0.44                              | 0.56                              | NA*                         | unclear functions; may be a heme chaperone                   |
| NDRG1   | 0.44                              | 0.69                              | 0.83                        | a tumor suppressor; specific functions unknown               |
| SEPHS2  | 0.44                              | 0.34                              | 0.88                        | enzyme; selenophosphate from selenide and ATP                |
| NRP2    | 0.44                              | 0.37                              | NA*                         | receptor for semaphorins and other proteins                  |
| MRC2    | 0.45                              | 0.25                              | 0.52                        | C-type mannose receptor                                      |
| DIS3    | 0.45                              | 0.45                              | 0.48                        | component of RNA exosome; possible nuclease                  |
| ADRBK2  | 0.45                              | 0.74                              | NA*                         | G protein-coupled receptor kinase                            |
| NAGA    | 0.45                              | 0.52                              | 0.71                        | alpha-N-acetylgalactosaminidase                              |
| MYCBP2  | 0.46                              | 0.44                              | 0.66                        | <b>E3 ubiquitin ligase; ubiquitylates Ser/Thr</b>            |
| MIPEP   | 0.46                              | 0.56                              | NA*                         | mitochondrial "intermediate" peptidase                       |
| CEP72   | 0.46                              | 0.71                              | NA*                         | a component of centrosome                                    |
| LEPREL2 | 0.46                              | 0.72                              | NA*                         | component of a prolyl 3-hydroxylase                          |
| ALDH1A2 | 0.46                              | 0.61                              | 0.65                        | enzyme; converts retinaldehyde to retinoic acid              |
| TTC39A  | 0.46                              | 0.35                              | NA*                         | unknown functions                                            |
| ZNF24   | 0.46                              | 0.50                              | 0.36                        | <b>TF; required for myelination of oligodendrocytes</b>      |
| PNKP    | 0.46                              | 1.0                               | NA*                         | bifunctional polynucleotide phosphatase/kinase               |
| RHOBTB3 | 0.46                              | 0.81                              | 0.53                        | ATPase required for endosome to Golgi transport              |
| SEC14L2 | 0.47                              | 0.76                              | NA*                         | carrier; binds to specific hydrophobic compounds             |
| HMOX1   | 0.47                              | 0.40                              | NA*                         | heme oxygenase-1                                             |
| ABCB8   | 0.47                              | 0.74                              | 0.49                        | subunit of mitochondrial potassium channel                   |

**Fig. S13C.** Continuation of Fig. S13A-B. MS analyses, using TMT-SPS-MS3 (10). Human proteins whose relative levels were decreased (from <0.42-fold to 0.47-fold) in 2-KO [*hsUBR1*<sup>-/-</sup>*hsUBR2*<sup>-/-</sup>] HEK293T cells (2-KO cell line #1 and 2-KO cell line #2) vs. wild-type HEK293T cells are cited in the second and third columns, respectively. The entries are cited in the order of fold-values determined for 2-KO cell line #1 vs. wild-type HEK293T cells. Fold-values for corresponding mRNAs, determined by RNA-seq (with RNA from 2-KO cell line #1 vs. RNA from wild-type cells) are cited in the fourth column. NA\* ("not applicable") refers to the absence of detectable mRNA levels in both 2-KO and wild-type cell lines. In the fifth column, transcription factors (TFs) and components of the ubiquitin-proteasome system are in red and blue, respectively. Functions of the cited proteins were compiled using entries in Uniprot (<https://www.uniprot.org/>) and/or GeneCards (<https://www.genecards.org/>). See also Fig. 2 and *SI Appendix*, Materials and Methods.

**(D)** MS analyses: proteins **decreased** (from 0.47 to 0.50) in [*UBR1*<sup>-/-</sup>*UBR2*<sup>-/-</sup>] cells

| Protein | Fold-change, in 2-KO cell line #1 | Fold-change, in 2-KO cell line #2 | RNA-seq, in #1, fold-change | Protein; functions                                         |
|---------|-----------------------------------|-----------------------------------|-----------------------------|------------------------------------------------------------|
| PLTP    | 0.47-fold                         | 0.66-fold                         | NA*                         | phospholipid transfer protein                              |
| QPRT    | 0.48                              | 0.13                              | NA*                         | nicotinate-nucleotide pyrophosphorylase                    |
| UBR3    | 0.48                              | 0.70                              | NA*                         | <b>E3 ubiquitin ligase; a sequelog of UBR1/UBR2</b>        |
| INPP5K  | 0.48                              | 0.49                              | NA*                         | inositol polyphosphate 5-phosphatase                       |
| TTC38   | 0.48                              | 0.80                              | 0.75                        | unknown functions                                          |
| IRS2    | 0.48                              | 0.48                              | NA*                         | a component of insulin signaling pathway                   |
| SHKBP1  | 0.48                              | 0.89                              | NA*                         | a part of EGF receptor signaling pathways                  |
| NOVA2   | 0.48                              | 0.62                              | NA*                         | RNA-binding protein; may regulate RNA splicing             |
| EIF2D   | 0.48                              | 0.59                              | 0.63                        | translation initiation factor-2D                           |
| SDK2    | 0.48                              | 0.72                              | NA*                         | adhesion protein in retinal synaptic connections           |
| TACC2   | 0.48                              | 0.44                              | NA*                         | a role in coupling the nucleus and the centrosome          |
| CHEK2   | 0.48                              | 0.78                              | NA*                         | Ser/Thr-protein kinase CHK2                                |
| LEPREL4 | 0.45                              | 0.25                              | NA*                         | component of a prolyl 3-hydroxylase                        |
| UCHL3   | 0.49                              | 0.37                              | 0.51                        | <b>a deubiquitylating enzyme (DUB)</b>                     |
| RBPMS   | 0.49                              | 0.43                              | NA*                         | <b>TF; also binds to RNA; coactivator of transcription</b> |
| ABCF2   | 0.49                              | 0.54                              | 0.60                        | unknown functions                                          |
| PLXDC2  | 0.49                              | 0.60                              | NA*                         | contains a plexin domain; unknown functions                |
| JUP     | 0.49                              | 0.48                              | 0.53                        | component of junctional plaques                            |
| HIC2    | 0.49                              | 0.60                              | 0.64                        | unknown functions                                          |
| SARS2   | 0.50                              | 0.74                              | NA*                         | Ser-tRNA ligase, mitochondrial                             |
| TGDS    | 0.50                              | 0.50                              | 0.59                        | dTDP-D-glucose-4,6-dehydratase                             |
| CTU1    | 0.50                              | 0.72                              | NA*                         | thiolation of mcm5S(2)U at tRNA wobble positions           |
| CDK5    | 0.50                              | 0.55                              | 0.49                        | cyclin-dependent-like kinase 5                             |
| ALDH1L2 | 0.50                              | 0.59                              | NA*                         | 10-formyltetrahydrofolate dehydrogenase                    |
| DLC1    | 0.50                              | 0.42                              | NA*                         | a Rho GTPase-activating protein                            |
| UPP1    | 0.50                              | 0.39                              | NA*                         | uridine phosphorylase                                      |
| HOXB9   | 0.50                              | 0.39                              | 0.67                        | <b>TF; roles in forming the anterior-posterior axis</b>    |

**Fig. S13D.** Continuation of Fig. S13A-C. Quantitative MS analyses, using the TMT-SPS-MS3 method (10). Human proteins whose relative levels were decreased (from <0.47-fold to 0.50-fold) in 2-KO [*hsUBR1*<sup>-/-</sup> *hsUBR2*<sup>-/-</sup>] HEK293T cells (2-KO cell line #1 and 2-KO cell line #2) vs. wild-type HEK293T cells are cited in the second and third columns, respectively. The entries are cited in the order of fold-values determined for 2-KO cell line #1 vs. wild-type HEK293T cells. Fold-values for the corresponding mRNAs, determined by RNA-seq (with RNA from 2-KO cell line #1 vs. RNA from wild-type cells) are cited in the fourth column. NA\* (“not applicable”) refers to the absence of detectable mRNA levels in both 2-KO and wild-type cell lines. In the fifth column, transcription factors (TFs) and components of the ubiquitin-proteasome system are in red and blue, respectively. Functions of the cited proteins were compiled using entries in Uniprot (<https://www.uniprot.org/>) and/or GeneCards (<https://www.genecards.org/>). See also Fig. 2 and *SI Appendix*, Materials and Methods.

## SI Materials and Methods

### Antibodies, Cell Media, and Other Reagents

The following primary antibodies were used for immunoblotting (IB): anti-flag M2 mouse monoclonal antibody (Sigma, F1804); anti-ha rabbit polyclonal antibody (Sigma, H6908); anti-GAPDH 6C5 mouse monoclonal antibody to human/mouse glyceraldehyde 3-phosphate dehydrogenase (Santa Cruz, SC-32233); anti-*hs*ADRB2 rabbit polyclonal antibody (Proteintech, 13096-1-AP); anti-*hs*DACH1 rabbit polyclonal antibody (Proteintech, 10914-1-AP); anti-GR D8H2 mouse monoclonal antibody to human glucocorticoid receptor (Cell Signaling, 3660); anti-NF-L (NFEL) C28E10 rabbit monoclonal antibody to human neurofilament light subunit (Cell Signaling, 2837); anti-NF-M (NFEM) 2H3 mouse monoclonal antibody to human neurofilament medium subunit (DSHB); anti-*hs*UBR1 A-5 mouse monoclonal antibody (Santa Cruz, SC-515753); and anti-*hs*UBR2 rabbit polyclonal antibody (Bethyl, A305-416-A). Anti-*hs*UBR1 and anti-*hs*UBR2 also recognized *mm*UBR1 and *mm*UBR2, respectively. Secondary antibodies for IB were goat anti-mouse IRDye 800CW conjugate (Li-Cor, C60405-05); goat anti-mouse HRP conjugate (Bio-Rad, 1706516); and goat anti-rabbit HRP conjugate (Bio-Rad, 1706515). Proteins on IB membranes were detected and quantified using Odyssey-9120 near-infrared imaging system (Li-Cor, Lincoln, NE). IB-based detection also used chemiluminescence (Amersham ECL Prime Western Blotting Detection Reagent; GE Healthcare, RPN2232).

Human cells lines were grown in DMEM containing also 4.5 g/L glucose, L-glutamine, sodium pyruvate (Corning, 10-013-CV). Growth media were supplemented with GlutaMAX (Gibco, 35050061) and penicillin-streptomycin (Genesee Scientific, 25-512). For propagation of cell cultures, cell monolayers were treated with trypsin-EDTA (VWR, 0154-0100). Transfections were carried out using GeneJuice Transfection Reagent (Sigma, 70967) and the manufacturer's protocol. "Complete protease inhibitor cocktail" (Roche, 11697498001) was added to lysis buffers for preparation of cell extracts. SDS-PAGE was carried out using 8%, 10%, 12%, or 4-12% NuPAGE Bis-Tris Gels (ThermoFisher). Other reagents were restriction endonucleases, T4 DNA ligase, and Q5 DNA polymerase (New England Biolabs).

### RNA-seq Analyses of Wild-Type Versus 2-KO [*hs*UBR1<sup>-/-</sup> *hs*UBR2<sup>-/-</sup>] Human HEK293T Cell Lines

RNA-seq was carried out with RNA preparations from wild-type vs. 2-KO [*UBR1*<sup>-/-</sup> *UBR2*<sup>-/-</sup>] human HEK293T cell lines using standard methods(2, 3) (Fig. 2 and *SI Appendix*, Figs. S2-S7). The wild-type (parental) HEK293T cell line (American Type Culture Collection, <https://www.atcc.org/products/all/crl-3216.aspx>) (13) was maintained as described (1). 2-KO HEK293T cell lines were constructed and characterized as described previously (1) (see also Fig. 2A), using the parental cell line (13) and sequential knockouts of *hs*UBR1 and *hs*UBR2 by the CRISPR-Cas9 technique (14-16).

500,000 cells of wild-type and 2-KO [*UBR1*<sup>-/-</sup> *UBR2*<sup>-/-</sup>] HEK293T cell lines were seeded, in triplicates, onto 10-cm plates, and cultures were incubated for 15 hrs at 37°C. Cell monolayers were gently washed once with phosphate-buffered saline (PBS) at room temperature (RT), then treated with 0.25% trypsin-EDTA (VWR, L0154-0100), and cell suspensions were passed through 40 μm nylon mesh filters (Bioland, CS040-01). ~1,000,000 cells of each sample were used to isolate and purify RNA. RNA-seq analyses were performed with three independently prepared RNA samples from cells of wild-type and 2-KO genotypes. Cells were lysed using

QIAshredder (QIAGEN 79654). RNA were purified using RNeasy Mini Kit (QIAGEN 74104). RNA samples were treated with RNase-Free DNase (QIAGEN 79254). mRNA preparations were obtained using NEBNext Poly(A) Magnetic Isolation Module (NEB E7490). cDNA libraries were produced from resulting mRNA preparations using NEBNext Ultra II Library Prep Kit (NEB E7770). Sequencing of cDNA libraries was carried out using Illumina HiSeq2500 System (2, 3).

The resulting (output) FASTQ files were analyzed using Galaxy server (<https://usegalaxy.org/>) (17). Quality of FASTQ files was assessed using FastQC (<http://www.bioinformatics.babraham.ac.uk/projects/fastqc>). Alignments to the latest human reference genome GRCh38 (18) were carried out using Bowtie2 (19) resulting in BAM alignment files (20). Alignments were visualized using BAM files and the UCSC Genome Browser (<http://genome.ucsc.edu/>) (21). Alignment reads were quantified using BAM files and FeatureCounts (22). DESeq2 (23) and R (<https://www.R-project.org/>) were used to analyze the observed changes in measured levels of specific RNAs (see also Results). Genes were annotated using org.Hs.eg.db (24).

The levels of specific mRNAs in cells of a given genotype, used to calculate the ratios (fold-values), were the averages of RNA-seq measurements with three independently prepared RNA samples from wild-type and 2-KO [*UBR1*<sup>-/-</sup> *UBR2*<sup>-/-</sup>] HEK203T cells, respectively. The scatter of RNA-seq data among three datasets for two cell lines (particularly for mRNAs whose levels changed by more than 2-fold in either direction) was quite low, <5% (*SI Appendix*, Fig. S2). The levels of some RNA-seq-quantified mRNAs, particularly the ones strongly increased or decreased in 2-KO vs. wild-type HEK293T cells, were also measured, independently, by two other methods, <sup>32</sup>P-Northern hybridizations and/or reverse transcription-quantitative PCR (RT-qPCR) (Fig. 2 and *SI Appendix*, Figs. S2-S7). In these measurements, a second, independently constructed 2-KO HEK293T cell line (denoted as 2-KO #2) was used as an additional control (Fig. 2B, E and *SI Appendix*, Fig. S3).

### **Mass Spectrometric (TMT-SPS-MS3) Analyses of Proteins in Wild-Type Versus 2-KO [*hsUBR1*<sup>-/-</sup> *hsUBR2*<sup>-/-</sup>] Human HEK293T Cell Lines**

These MS-based analyses employed the TMT-SPS-MS3 method (10) (*SI Appendix*, Fig. S11) and were performed using protein preparations from the above-described wild-type vs. 2-KO HEK293T cells. ~500,000 cells of wild-type and 2-KO HEK293T cell line clones were seeded, in triplicates, onto 10-cm plates, and cultures were incubated for 15 hr at 37°C. Cell monolayers were gently washed once with phosphate-buffered saline (PBS) at room temperature (RT), then treated with 0.25% trypsin-EDTA (VWR, L0154-0100), and cell suspensions were passed through 40 µm nylon mesh filters (Bioland, CS040-01). Each sample was split in half and flash frozen in liquid N<sub>2</sub>. One half of each sample was used for IB analyses using anti-*hsUBR1* and anti-*hsUBR2* antibodies, to verify the 2-KO state of [*UBR1*<sup>-/-</sup> *UBR2*<sup>-/-</sup>] HEK293T cells (*SI Appendix*, Fig. S10). The other half was used for TMT-SPS-MS3 analyses.

**MS sample processing.** Cell pellets were lysed using 8 M urea in 0.2 M EPPS buffer (pH 8.5) supplemented with protease inhibitors (Roche, 11697498001). DNA was sheared by 20 passages through a 20g syringe. Protein concentration was determined using a BCA assay. 100 µg of total protein was used for each Tandem Mass Tag (TMT; Thermo-Fisher, A34808) channel. Protein extracts were reduced with 5 mM (final concentration) TCEP (tris(2-carboxyethyl)phosphine) for 30 min, alkylated with 10 mM (final concentration) iodoacetamide for 30 min in the dark, then quenched with 10 mM (final concentration) DTT (dithiothreitol) for

15 min. All steps were performed at room temperature (RT). Proteins were then precipitated with chloroform/methanol. Briefly, to 0.1 ml of each sample, 0.4 ml of methanol was added, followed by 0.1 ml of chloroform, with thorough vortexing. Next, 0.3 ml of HPLC-grade water was added, and samples were vortexed thoroughly. Each sample was centrifuged at 14,000g for 5 min at RT. Both aqueous and organic layers were removed. A protein pellet was washed twice with methanol (1 ml) and centrifuged at 14,000g for 5 min at RT. Washed protein pellets were re-solubilized in 0.1 ml of 0.2 M EPPS buffer (pH 8.5) and proteins were digested overnight with Lys-C (enzyme/protein ratio of 1:100) at RT. Next day, MS-grade trypsin (1:100 ratio) (Pierce, #90058) was added, followed by incubation at 37°C for 6 hr.

To each digested sample, 30  $\mu$ l of anhydrous acetonitrile (ACN) was added, and peptides were labeled using 0.2 mg of TMT 10-plex reagents (1 hr at RT). Excess of TMT reagent was quenched with 0.5% hydroxylamine. To equalize protein loading, a ratio check was performed by pooling 1  $\mu$ l (~1  $\mu$ g) of each TMT-labeled sample. Samples were pooled and desalted using in-house packed Empore C18 (3M) StageTips and analyzed by LC-MS/MS. Based on the ratio check, samples were mixed 1:1 across all TMT channels and desalted using a 100 mg Sep-Pak solid phase extraction cartridge (Waters). Desalted peptides were fractionated by basic-pH reverse-phase (bRP) HPLC using an Agilent 300 extend C18 column and collected into a 96 well plate. Samples were consolidated into 24 fractions, and 12 nonadjacent fractions were desalted using StageTips prior to analyses using LC-MS/MS.

**MS data acquisition.** TMT-labeled peptides were resuspended in 5% ACN/5% formic acid and loaded onto an in-house pulled C18 column (30cm, 2.6  $\mu$ m Accucore (Thermo-Fisher, 100  $\mu$ m internal diameter) with 100% buffer A (5% ACN, 0.125% formic acid) and eluted using a 90-min linear gradient from 0% to 30% buffer B (95% ACN, 0.125% formic acid). Eluted peptides were injected into an Orbitrap Fusion mass spectrometer equipped with a Thermo FAIMS Pro device, which was run using default parameters (25, 26) Briefly, FAIMS inner and outer electrodes were set to 100C, with transport gas preset to 4.7 L/min. Three FAIMS compensation voltages (40, 60, 80) were used during acquisition. Peptides were acquired using synchronous precursor selection (SPS-MS3) method (27) for TMT quantification. Briefly, high resolution MS1 precursor scans were acquired at 120 K resolution, 1e5 AGC target with a maximum of 50 ms injection time. MS2 spectra were acquired by selecting the top ten most abundant features via collisional induced dissociation (CID) of 35% in the ion trap, 2e4 AGC target, quadrupole isolation width of 0.7  $m/z$  and a maximum ion time of 50 ms. For MS3 acquisition, a synchronous precursor selection of ten fragment ions was acquired with an AGC of 2e5 K for 100 ms and a HCD collision energy of 65%.

**MS data analysis.** All acquired raw data were converted to mzXML. Spectra were searched with Comet (28), using an in-house proteomic pipeline against the human Uniprot database (February 2014), appended with reverse protein sequences and common contaminants. Searches were completed with the following parameters: 50 ppm precursor tolerance, fragment ion tolerance of 0.9 Da, static modifications of TMT (+229.163 Da) on lysine and peptide N-termini, and carbamidomethylation of cysteine residues (+57.021 Da), while oxidation of methionine residues (+15.995 Da) was set as a variable modification, and two missed cleavages were allowed. Briefly, peptide spectral libraries were first filtered to a peptide false discovery rate (FDR) of less than 1% using linear discriminant analysis (29) employing a target decoy strategy (30) The resulting peptides were further filtered to obtain a <1% protein FDR using the picked FDR method (31) Reporter ion intensities were adjusted to correct for impurities during synthesis of TMT reagents according to the manufacturer's specifications. For quantitation, a

total sum signal-to-noise of all report ions of 100 was required for analysis, isolation specificity >0.50. Protein quantitative values were normalized (column normalization) so that the sum of the signal for all protein in each channel was equal to account for sample loading.

### **Cell Viability and Proliferation Assays**

Cell viability and proliferation were assayed using Trypan Blue exclusion test (32). Wild-type and 2-KO HEK293T cells were seeded, in quadruplicate for each genotype, at 500 cells/well in 24-well plates in DMEM-based medium described above, and were grown at 37°C. At indicated time points, cell monolayers were gently washed PBS at 37°C, then treated with 0.25% trypsin-EDTA (VWR, L0154-0100). Trypsin was inactivated by adding one volume of DMEM-based medium. Trypan blue dye (Gibco, 15250061) was added to cell suspensions at 0.2% (v/v). Cells were immediately counted using a hemocytometer under the microscope.

### **Cell Toxicity Assays with Methyloxalylglycine (MOG), Which Is Imported by the *hsMCT2* Transporter**

N-oxalylglycine (NOG), an analog of  $\alpha$ -ketoglutarate ( $\alpha$ KG), is a cytotoxic inhibitor of  $\alpha$ KG-dependent dioxygenases ( $\alpha$ KGDDs), but it cannot efficaciously enter mammalian cells (33). Dimethyloxalylglycine (DMOG), a derivative of NOG, is rapidly hydrolyzed, in aqueous solutions, to methyloxalylglycine (MOG) (33). The latter is converted to NOG upon MOG's entry into cells. The import of MOG has been shown to be mediated largely by the MCT2 (SLC16A7) transporter (33). Consequently, a higher level of *hsMCT2* in 2-KO HEK293T cells, in comparison to wild-type cells, would be predicted to make the former cells hypersensitive to extracellular DMOG. Other biochemical aspects of this assay are described in Results.

To compare sensitivities of 2-KO and wild-type HEK293T human cells to N-oxalylglycine (NOG), whose precursor MOG is imported largely by *hsMCT2*, a cell mass accumulation assay was used (33). Cells were grown in DMEM containing also 10% fetal bovine serum (FBS), 4.5 g/L glucose, L-glutamine, sodium pyruvate (Corning, 10-013-CV), GlutaMAX (Gibco, 35050061) and penicillin-streptomycin (Genesee Scientific, 25-512). Wild-type and 2-KO HEK293T cells were seeded in triplicate (for each genotype) at 25,000 cells/well in 12-well plates in the DMEM-based medium described above, and were grown at 37°C for 12 hrs. Thereafter cell monolayers were gently washed with PBS at 37°C, followed by the addition of fresh DMEM-based medium at 37°C. At the same time, either MOG (to the final concentration of 5 mM) or buffer alone were added, respectively, to experimental and control samples, followed by a further incubation for 96 hrs. Cell monolayers were then gently washed twice with ice-cold PBS (0.5 ml/well), and thereafter treated with 3.7% formaldehyde in PBS (pH 7.5) (0.5 ml/well) for 10 min at RT. Fixed cells, in each well, were gently washed with 0.5 ml/well PBS at RT, and cells were then stained with 0.1% (w/v) crystal violet solution in 20% ethanol (0.5 ml/well) at RT for 15 min. Cell monolayers were then washed twice with 0.5 ml/well water for 10 min, and air-dried. To quantify the relative amounts of cell mass per well, the dye was extracted by adding, to each well, 0.25 ml of 10% (v/v) CH<sub>3</sub>COOH, incubating the plate, with gentle rocking, for 10 min at RT, followed by measurements of A<sub>600</sub> in extracts (33).

### **Immunoblotting**

IB analyses were carried out largely as described previously (3, 34-36). Briefly, following SDS-PAGE, fractionated proteins in a polyacrylamide gel were electroblotted onto a nitrocellulose or PVDF membrane using iBlot (Invitrogen, 25-0912; Program 3; 7-min transfer



for regular detection, or 8-min transfer for detection of high molecular mass proteins). Membranes with electroblotted proteins were blocked (3) and thereafter incubated with a relevant primary antibody, followed by either LI-COR IRDye-conjugated secondary antibodies or HRP-conjugated secondary antibodies. Protein bands were detected and quantified using Odyssey-9120 and its software, or using chemiluminescence and the ImageJ program (37).

### Chase-Degradation Assays

They were carried out largely as previously described (34, 35). Briefly, wild-type and mutant HEK293T cells were seeded at 400,000 cells/well in 6-well plates in a DMEM-based medium described above, and were grown at 37°C for 2 days. Thereafter cell monolayers were gently washed with phosphate-buffered saline (PBS) at 37°C, followed by addition of fresh DMEM-based medium at 37°C. At that point, cells in “zero-time” plates were removed and processed as described below. At the same time, cycloheximide (CHX) (Sigma, C7698) was added to other wells (to the final concentration of 0.25 mg/ml), initiating the chase. For chase assays with geldanamycin (GA) treatment, geldanamycin (LC Laboratories, G-4500) was added (to the final concentration of 10 µM) together with CHX. At indicated times, cells in individual wells were briefly and gently washed with ice-cold PBS, harvested into 1.5 ml tubes, and pelleted by centrifugation at 10,000g for 1 min. Cells were then lysed by sonicating a suspension for 10 sec in 0.2 ml of RIPA buffer (3) containing “protease inhibitor cocktail” (Roche, 11697498001), using microtip (Branson sonicator, 101-148-062) at 10% duty cycle and output 2, followed by centrifugation at 10,000g for 10 min. Total protein concentration in supernatants were measured by the bicinchoninic acid (BCA) assay (ThermoFisher, 23225). The resulting samples (30 µg of total protein in 45 µl of lithium dodecyl sulfate (LDS) sample buffer) were heated at 70°C for 10 min, followed by SDS-PAGE and IB assays. Quantification of protein degradation in these assays was done using the ImageJ program (37). Briefly, ImageJ quantified the brightness of specific IB-detected protein bands vs. background brightness.

### <sup>32</sup>P-Northern Hybridization Analyses

<sup>32</sup>P-Northern analyses were performed using RNA preparations from wild-type and 2-KO HEK293T cells. Cells of each genotype were seeded onto 10-cm plates, at ~500,000 cells per plate, and cultures were incubated for 15 hrs at 37°C. Cell monolayers were gently washed once with PBS at room temperature (RT), then treated with 0.25% trypsin-EDTA (VWR, L0154-0100), and cell suspensions were passed through 40 µm nylon mesh filters (Bioland, CS040-01). ~1,000,000 cells of each sample were lysed using QIAshredder (QIAGEN 79654). RNA were purified using RNeasy Mini Kit (QIAGEN 74104). RNA samples were treated with RNase-Free DNase (QIAGEN 79254). RNA was fractionated in 1% agarose RNA-denaturing gels (ThermoFisher, AM8676) and transferred onto Nytran SuperCharge nylon membranes overnight, using TurboBlotter Kit (Cytiva, 10416300) and 20xSSC buffer (3M NaCl, 0.3 M sodium citrate, pH 7.0). Nylon membranes were washed once with 2xSSC buffer and dried in an oven for 7 hrs at 80°C. Membranes (8 x 11 cm) were then pre-hybridized with 10 ml of ULTRAhyb Ultrasensitive Hybridization Buffer (ThermoFisher, AM8670).

DNA segments for producing radiolabelled RNA probes were cloned into pcDNA3 vector, with a T7 promoter upstream of cDNA sequences of human *hsADRB2* (pTV602), *hsMAGEA6* (pTV599), and *hsGAPDH* (pTV598) mRNAs. Plasmids (50 µg of each) were digested overnight with *NdeI* and *EcoRI*, and DNA fragments (which contained the T7 transcriptional promoter and a specific cDNA) were purified using 1% agarose gel electrophoresis

and Zymoclean Gel DNA Recovery Kit (Zymo Research, D4008), with elution into 6  $\mu$ l of water. RNA probes were produced using 20  $\mu$ l reaction samples containing MAXiscript T7 Transcription Kit (ThermoFisher, AM1312) 12.5  $\mu$ M [ $\alpha$ - $^{32}$ P] UTP (10 mCi/ml; PerkinElmer, BLU007X250UC, and 6  $\mu$ g of purified DNA template. DNA was removed by treating completed reactions with 1  $\mu$ l of TURBO DNase I (ThermoFisher, AM1907) for 30 min at 37°C. Radiolabelled RNA probes were purified using NucAway Spin Columns (ThermoFisher, AM10070).  $^{32}$ P of RNA probes was measured using Beckman Coulter LS6500 liquid scintillation counter. An RNA probe (5,000,000-8,000,000 dpm) was hybridized to DNA on nylon membranes overnight in 10 ml of the above hybridization buffer. Membranes were washed twice with 10 ml of low-stringency washing buffer (ThermoFisher, AM8673) for 5 min at 68°C, and then twice with 10 ml of high-stringency washing buffer (ThermoFisher, AM8674) for 15 min at 68°C. Radioautographic exposures of membranes and quantifications were carried out using Typhoon FLA 9500 (GE Healthcare Life Sciences). For re-probing a membrane, it was incubated in 50 ml of boiling 0.1% SDS for 15 min.

### Quantitative Reverse Transcription PCR (RT-qPCR)

RT-qPCR was carried out largely as described previously (38). Briefly, samples of a mouse tissue or cells grown in culture were lysed using QIAshredder (Qiagen, 79654), and RNA was purified using RNeasy Mini Kit (Qiagen, 74104), with an additional treatment by RNase-Free DNase (Qiagen, 79254) to preclude DNA contamination. RNA integrity and purity were assessed in part by spectrophotometric measurements (with  $A_{260}/A_{280} > 1.8$  and  $A_{260}/A_{230} > 1.5$ ), using NanoPhotometer (Implen), and also by agarose gel electrophoresis. Reverse transcription, to synthesize cDNA, was carried at 42°C for 1 hr in a 20  $\mu$ l reaction sample containing RNA (25 ng/ $\mu$ l), 400 units of M-MuLV Reverse Transcriptase (Lucigen, 97065-184), 20 units of RNase Inhibitor (Lucigen, 97065-224), 6  $\mu$ M Random Primer Mix (NEB, S1330S), and 2 mM Deoxynucleotide (dNTP) Solution Mix (NEB, N00447S). cDNA synthesis was terminated by heating samples at 85°C for 1 min. qPCR was carried out with 0.5 ng/ $\mu$ l of cDNA, 1X SYBR Green I-based qPCR Master Mix (Bioland, QP01), and 250 nM of a cDNA-specific oligonucleotide (cited in Table S2) in a 20  $\mu$ l reaction sample using Mastercycler RealPlex2 (Eppendorf) and the following qPCR program: 1 cycle at 95°C for 10 min; 45 cycles at 95°C for 15 sec and at 60°C for 30 sec; 1 cycle at 95°C for 15 sec and at 60°C for 15 sec. PCR products were then subjected to increases of temperature from 60°C to 95°C at 1.75°C/min, and thereafter incubated at 95°C for 15 sec (for melting-curve analyses). All RT-qPCR assays were carried out at least in duplicate. Analyses of relative levels of gene expression were carried out using the  $2^{-\Delta/\Delta C_t}$  method for a gene of interest vs. expression of the *GAPDH* gene, as previously described (39, 40).

### Yeast Strains, Media, and Genetic Techniques

*S. cerevisiae* media included YPD (1% yeast extract, 2% peptone, 2% glucose; only most relevant components are cited); SD medium (0.17% yeast nitrogen base, 0.5% ammonium sulfate, 2% glucose); and synthetic complete (SC) medium (0.17% yeast nitrogen base, 0.5% ammonium sulfate, 2% glucose) plus a drop-out mixture of compounds required by specific auxotrophic strains. *S. cerevisiae* strains used in this work are cited in the next section. Standard techniques were used for construction of specific *S. cerevisiae* strains and transformation by DNA (3, 41).

### Split-Ubiquitin Assays

The assay's concept (42, 43) is described in Results (Fig. 4A). A version of split-Ub assay was carried out in *S. cerevisiae* largely as described previously (36, 44). *S. cerevisiae* NMY51 (*MATa trp1 leu2 his3 ade2 LYS2::lexA-HIS3 ade2::lexA-ADE2 URA3::lexA-lacZ*) (Dualsystems Biotech AG, Schlieren, Switzerland) was cotransformed with split-Ub-based bait and prey plasmids (Table S1) using the lithium acetate method (41). Transformants were selected for the presence of both bait and prey plasmids during ~3 days of growth at 30°C on SC(-Trp, -Leu) medium (minimal medium containing 2% glucose, 0.67% yeast nitrogen base, 2% bacto-agar, and complete amino acid mixture that lacked Leu and Trp). Single colonies of resulting cotransformants were grown in SC(-Trp, -Leu) liquid medium to A<sub>600</sub> of ~1.0, a near-stationary phase. The cultures were thereafter serially diluted by 3-fold, and 10 µl samples of cell suspensions were spotted onto either double-dropout SC(-Trp, -Leu), triple-dropout SC(-Trp,-Leu,-His) plates, or quadruple-dropout SC(-Trp,-Leu,-His,-Ade), which were incubated at 30°C for 2 to 4 days.

**Table S1.** Plasmids used in this study.

| Name   | Description                                                           | Source            |
|--------|-----------------------------------------------------------------------|-------------------|
| pDHB1  | Split-Ub vector, Ost4-C <sub>Ub</sub> -LexA-VP16                      | MoBiTec, P01001DS |
| pPR3-N | Split-Ub vector, N <sub>UbG</sub> vector                              | MoBiTec, P01001DS |
| pTV471 | Ost4-C <sub>Ub</sub> - <i>hsUBR1</i> -LexA-VP16                       | This study        |
| pTV472 | Ost4-C <sub>Ub</sub> - <i>hsUBR1</i> <sup>1-1059</sup> -LexA-VP16     | This study        |
| pTV473 | Ost4-C <sub>Ub</sub> - <i>hsUBR1</i> <sup>1060-1749</sup> -LexA-VP16  | This study        |
| pTV469 | N <sub>UbG</sub> - <i>hsPREP1</i>                                     | This study        |
| pTV620 | N <sub>UbG</sub> - <i>hsGR-A</i>                                      | This study        |
| pTV621 | N <sub>UbG</sub> - <i>hsGR-D</i>                                      | This study        |
| pTV598 | pcDNA3 based plasmid for generating RNA probe against <i>hsGAPDH</i>  | This study        |
| pTV599 | pcDNA3 based plasmid for generating RNA probe against <i>hsMAGEA6</i> | This study        |
| pTV602 | pcDNA3 based plasmid for generating RNA probe against <i>hsADRB2</i>  | This study        |

**Table S2.** Oligonucleotide primers used in this study.

| Name   | Nucleotide Sequence (5'-3')    | Use                   |
|--------|--------------------------------|-----------------------|
| TV1029 | AAGCTTGGTACCCAGGAAATGAGCTTGACA | Cloning pTV598        |
| TV1030 | TCTGCAGAATTCGTTTACATGTTCCAATAT | Cloning pTV598        |
| TV1031 | AAGCTTGGTACCTCACTCTTCCCCCTCTCT | Cloning pTV599        |
| TV1032 | AAGCTTGGTACCTTAAATGTTAGTTTCTCT | Cloning pTV599        |
| TV1035 | AAGCTTGGTACCCAGCAGTGAGTCATTTGT | Cloning pTV602        |
| TV1036 | TCTGCAGAATTCATGTCCAGAACCTTAGCC | Cloning pTV602        |
| TV1015 | ATGATGCGGGTTTCCAATCG           | RT-qPCR for hsB4GALT6 |
| TV1016 | GATATGTGTTGGCGATGCCT           | RT-qPCR for hsB4GALT6 |
| TV1019 | CCACGCCGGACAGAATAGAT           | RT-qPCR for hsBARX1   |
| TV1020 | CTGGTACCACGTCTTCACCT           | RT-qPCR for hsBARX1   |
| TV987  | TCCTGCTTATCCTTGTGCTGA          | RT-qPCR for hsCDH2    |
| TV988  | GTTTGGCCTGGCGTTCTTTA           | RT-qPCR for hsCDH2    |
| TV997  | AGAAGACCTCTGCACTGACC           | RT-qPCR for hsCELSR3  |
| TV998  | AAGGCTAGGATGCTGTGGTT           | RT-qPCR for hsCELSR3  |
| TV985  | TCTACTGTACGCGCTACTCG           | RT-qPCR for hsEN2     |
| TV986  | CGCTTGTCTCTTTGTTCCGG           | RT-qPCR for hsEN2     |
| TV1003 | GGCCTACACACAGGTCATCT           | RT-qPCR for hsGAA     |
| TV1004 | GGTCACACGTACCAGCTCAT           | RT-qPCR for hsGAA     |

|        |                       |                           |
|--------|-----------------------|---------------------------|
| TV724  | CTCCTCCTGTTCGACAGTCA  | RT-qPCR for hsGAPDH       |
| TV725  | CGACCAAATCCGTTGACTCC  | RT-qPCR for hsGAPDH       |
| TV1000 | TCCAGCAGTTTCCTGTAAGC  | RT-qPCR for hsINA         |
| TV999  | ACACCAAGAGTGAGATGGCA  | RT-qPCR for hsINA         |
| TV1017 | TCAGGGACCTTCTCAGGTACT | RT-qPCR for<br>hsLGALS3BP |
| TV1018 | GCTTGTGGAAGCACTTGACT  | RT-qPCR for<br>hsLGALS3BP |
| TV991  | AGCTGGTGACCATGTCTGTG  | RT-qPCR for hsMAF         |
| TV992  | ATCACCTCCTCCTTGCTGAC  | RT-qPCR for hsMAF         |
| TV975  | CCAAGGGCCCTCATTGAAAC  | RT-qPCR for hsMAGEA6      |
| TV976  | CTCTCAAAGCCCACTCATGC  | RT-qPCR for hsMAGEA6      |
| TV1005 | CTTGCAAGCCAGACTCAAGG  | RT-qPCR for hsMBNL3       |
| TV1006 | AGTTGCAGTGTACCAGGCT   | RT-qPCR for hsMBNL3       |
| TV1007 | CGCCGCCAAGACATATGAG   | RT-qPCR for hsMSX2        |
| TV1008 | GAGGAGCTGGGATGTGGTAA  | RT-qPCR for hsMSX2        |
| TV1021 | CCTGCAGAGCAAGGAATGTG  | RT-qPCR for hsMYD88       |
| TV1022 | TTGGTGTAGTCGCAGACAGT  | RT-qPCR for hsMYD88       |
| TV995  | TCAATGACAAGGTGGCCAAG  | RT-qPCR for hsNPTX1       |
| TV996  | GTGGTCCAGGTGACACAGAT  | RT-qPCR for hsNPTX1       |
| TV1013 | TGGAACCCTGATCTCACACC  | RT-qPCR for hsPCDH9       |

|        |                       |                       |
|--------|-----------------------|-----------------------|
| TV1014 | CCAAAGGCCCATCAGAGTTG  | RT-qPCR for hsPCDH9   |
| TV979  | AGACAGCAGCAAGGTGTGTA  | RT-qPCR for hsRNF125  |
| TV980  | AACGGCAAAGTGGACAGAAC  | RT-qPCR for hsRNF125  |
| TV981  | ACGGGCCTTAGACCTTGAAA  | RT-qPCR for hsRNF138  |
| TV982  | TCACTCCTATTGCTGTTCCT  | RT-qPCR for hsRNF138  |
| TV1009 | GTGTGGCCCAGTTCTTCTTG  | RT-qPCR for hsSLC16A7 |
| TV1010 | CGCTTGCTGCTACCACAATA  | RT-qPCR for hsSLC16A7 |
| TV1025 | CCTTTGGCACTCTCAACCAG  | RT-qPCR for hsSLC2A3  |
| TV1026 | GCTCTTCAGACCCAAGGATG  | RT-qPCR for hsSLC2A3  |
| TV977  | CATGAGAGCTGTGTGCTGTC  | RT-qPCR for hsTLE4    |
| TV978  | AGGTGTTCTCCAGGCATTCA  | RT-qPCR for hsTLE4    |
| TV1001 | CCTGGTGGAGCATAAGACCT  | RT-qPCR for hsTRIM25  |
| TV1002 | TTTGCAGTCATCCGCACATC  | RT-qPCR for hsTRIM25  |
| TV983  | TGAGCTTGATGCTGTGGAGA  | RT-qPCR for hsZNF24   |
| TV984  | ACCATCATCATCACAGTGCCT | RT-qPCR for hsZNF24   |

## SI References

1. Vu TTM, Varshavsky A (2020) The ATF3 transcription factor is a short-lived substrate of the Arg/N-degron pathway. *Biochemistry* 59:2796-2812.
2. Van der Berge K, *et al.* (2019) RNA sequencing data: hitchhiker's guide to expression analysis. *Annu. Rev. Biomed. Data Sci.* 2:139-173.
3. Ausubel FM, *et al.* (2017) *Current Protocols in Molecular Biology*. (Wiley-Interscience, New York).
4. Conesa A, *et al.* (2016) A survey of best practices for RNA-seq data analysis. *Genome Biol.* 17:13.
5. Bahouth SW, Beauchamp MJ, Vu KN (2002) Reciprocal regulation of beta(1)-adrenergic receptor gene transcription by Sp1 and early growth response gene 1: induction of EGR-1 inhibits the expression of the beta(1)-adrenergic receptor gene. *Mol. Pharmacol.* 61:379-390.
6. Jaeger A, Fritschka S, Ponsuksili S, Wimmers K, Murani E (2015) Identification and functional characterization of cis-regulatory elements controlling expression of the porcine ADRB2 gene. *Int. J. Biol. Sci.* 11:1006-1015.
7. Baeyens DA, McGraw DW, Jacobi SE, Cornett LE (1998) Transcription of the beta2-adrenergic receptor gene in rat liver is regulated during early postnatal development by an upstream repressor element. *J. Cell. Physiol.* 175:333-340.
8. Li L, He S, Sun JM, Davie JR (2004) Gene regulation by Sp1 and Sp3. *Biochem. Cell Biol.* 82:460-471.
9. O'Connor L, Gilmour J, Bonifer C (2016) The Role of the ubiquitously expressed transcription factor Sp1 in tissue-specific transcriptional regulation and in disease. *Yale J. Biol. Med.* 89:513-525.
10. Navarrete-Perea J, Yu Q, Gygi SP, Paulo JA (2018) Streamlined tandem mass tag (SL-TMT) protocol: an efficient strategy for quantitative (phospho)proteome profiling using tandem mass tag-synchronous precursor selection-MS3. *J. Proteome Res.* 17:2226-2236.
11. Varshavsky A (2019) On the cause of sleep: protein fragments, the concept of sentinels, and links to epilepsy. *Proceedings of the National Academy of Sciences of the United States of America* 116:10773-10782.
12. Crawford ED, *et al.* (2013) The DegraBase: a database of proteolysis in healthy and apoptotic human cells. *Mol. Cell. Proteomics* 12(3):813-824.
13. Stepanenko AA, Dmitrenko VV (2015) HEK293 in cell biology and cancer research: phenotype, karyotype, tumorigenicity, and stress-induced genome-phenotype evolution. *Gene* 569:182-190.
14. Ran FA, *et al.* (2013) Genome engineering using the CRISPR-Cas9 system. *Nat. Protoc.* 8:2281-2308.
15. Zheng Q, *et al.* (2014) Precise gene deletion and replacement using the CRISPR/Cas9 system in human cells. *BioTechniques* 57(3):115-124.
16. Knott GJ, Doudna JA (2018) CRISPR-Cas guides the future of genetic engineering. *Science* 361:866-869.
17. Afgan E, *et al.* (2018) The Galaxy platform for accessible, reproducible and collaborative biomedical analyses: 2018 update. *Nucl. Acids Res.* 46:W537–W544.



18. Schneider VA, *et al.* (2017) Evaluation of GRCh38 and de novo haploid genome assemblies demonstrates the enduring quality of the reference assembly. *Genome Res.* 27:849-864.
19. Langmead B, Salzberg SL (2012) Fast gapped-read alignment with Bowtie 2. *Nat. Methods* 9:357-359.
20. Li H, *et al.* (2009) The sequence alignment/map format and SAMtools. *Bioinformatics (Oxford, England)* 25(16):2078-2079.
21. Kent WJ, *et al.* (2002) The human genome browser at UCSC. *Genome Res.* 12: 996–1006.
22. Liao Y, Smyth GK, Shi W (2014) featureCounts: an efficient general purpose program for assigning sequence reads to genomic features. *Bioinforma* 30:923–930.
23. Love MI, Huber W, Anders S (2014) Moderated estimation of fold change and dispersion for RNA-seq data with DESeq2. *Genome Biol.* 15:550
24. Carlson M (2019) org.Hs.eg.db: Genome wide annotation for Human. R package version 3.8.2 (DOI: 10.18129/B9.bioc.org.Hs.eg.db).
25. Schweppe DK, *et al.* (2019) Characterization and Optimization of Multiplexed Quantitative Analyses Using High-Field Asymmetric-Waveform Ion Mobility Mass Spectrometry. *Anal Chem* 91(6):4010-4016.
26. Schweppe DK, Rusin SF, Gygi SP, Paulo JA (2020) Optimized Workflow for Multiplexed Phosphorylation Analysis of TMT-Labeled Peptides Using High-Field Asymmetric Waveform Ion Mobility Spectrometry. *J Proteome Res* 19(1):554-560.
27. McAlister GC, *et al.* (2014) MultiNotch MS3 enables accurate, sensitive, and multiplexed detection of differential expression across cancer cell line proteomes. *Anal Chem* 86(14):7150-7158.
28. Eng JK, Jahan TA, Hoopmann MR (2013) Comet: an open-source MS/MS sequence database search tool. *Proteomics* 13(1):22-24.
29. Huttlin EL, *et al.* (2010) A tissue-specific atlas of mouse protein phosphorylation and expression. *Cell* 143(7):1174-1189.
30. Elias JE, Gygi SP (2007) Target-decoy search strategy for increased confidence in large-scale protein identifications by mass spectrometry. *Nat Methods* 4(3):207-214.
31. Savitski MM, Wilhelm M, Hahne H, Kuster B, Bantscheff M (2015) A Scalable Approach for Protein False Discovery Rate Estimation in Large Proteomic Data Sets. *Mol Cell Proteomics* 14(9):2394-2404.
32. Strober W (2015) Trypan Blue exclusion test of cell viability. *Curr. Protoc. Immunol.* 111:A3.b.1-a3.b.3.
33. Fets L, *et al.* (2018) MCT2 mediates concentration-dependent inhibition of glutamine metabolism by MOG. *Nat. Chem. Biol.* 14:1032-1042.
34. Wadas B, *et al.* (2016) Degradation of serotonin N-acetyltransferase, a circadian regulator, by the N-end rule pathway. *J. Biol. Chem.* 291:17178-17196.
35. Piatkov KI, Brower CS, Varshavsky A (2012) The N-end rule pathway counteracts cell death by destroying proapoptotic protein fragments. *Proc. Natl. Acad. Sci. USA* 109:E1839-E1847.
36. Oh JH, Hyun JY, Varshavsky A (2017) Control of Hsp90 chaperone and its clients by N-terminal acetylation and the N-end rule pathway. *Proc. Natl. Acad. Sci. USA* 114:E4370-E4379.

37. Schneider CA, Rasband WS, Eliceiri KW (2012) NIH Image to ImageJ: 25 years of image analysis. *Nat. Methods* 9:671-675.
38. Green MR, Sambrook J (2012) *Molecular Cloning: A Laboratory Manual (4th edition)* (Cold Spring Harbor Laboratory Press: Cold Spring Harbor, N.Y).
39. Pfaffl MW ( A New Mathematical Model for Relative Quantification in Real-Time RT-PCR. *Nucl. Ac. Res.* 29:e45.
40. Livak KJ, Schmittgen TD (2001) Analysis of Relative Gene Expression Data Using Real-Time Quantitative PCR and the 2(-Delta Delta C(T)) Method. *Methods* 25 402–408.
41. Andrews B, Boone C, Davis TN, Fields S (2016) *Budding Yeast (a laboratory manual)*. (Cold Spring Harbor Press, Cold Spring Harbor, NY ).
42. Johnsson N, Varshavsky A (1994) Split ubiquitin as a sensor of protein interactions in vivo. *Proc. Natl. Acad. Sci. USA* 91:10340-10344.
43. Dunkler A, Muller J, Johnsson N (2012) Detecting protein-protein interactions with the split-ubiquitin sensor. *Methods Mol. Biol.* 786:115-130.
44. Gisler SM, *et al.* (2008) Monitoring protein-protein interactions between the mammalian integral membrane transporters and PDZ-interacting partners using a modified split-ubiquitin membrane yeast two-hybrid system. *Mol. Cell. Proteomics* 7:1362-1377.
